1 Title: Expanding the *Caenorhabditis elegans* auxin-inducible degron system toolkit with  
2 internal expression and degradation controls and improved modular constructs for  
3 CRISPR/Cas9-mediated genome editing

4 Authors: Guinevere Ashley<sup>1</sup>, Tam Duong<sup>2</sup>, Max T. Levenson<sup>1</sup>, Michael A. Q. Martinez<sup>3</sup>,  
5 Jonathan D. Hibshman<sup>4</sup>, Hannah N. Saeger<sup>1</sup>, Ryan Doonan<sup>5</sup>, Nicholas J. Palmisano<sup>3</sup>,  
6 Raquel Martinez-Mendez<sup>1</sup>, Brittany Davidson<sup>1</sup>, Wan Zhang<sup>3</sup>, James Matthew Ragle<sup>1</sup>,  
7 Taylor N. Medwig-Kinney<sup>3</sup>, Sydney S. Sirota<sup>3</sup>, Bob Goldstein<sup>4,6</sup>, David Q. Matus<sup>3</sup>, Daniel  
8 J. Dickinson<sup>5</sup>, David J. Reiner<sup>2</sup>, and Jordan D. Ward<sup>1,‡</sup>

9  
10 <sup>1</sup>Department of Molecular, Cell, and Developmental Biology, University of California-  
11 Santa Cruz, Santa Cruz, CA 95064, USA.

12 <sup>2</sup>Institute of Biosciences and Technology, Texas A&M Health Science Center, Houston,  
13 TX 77030, USA.

14 <sup>3</sup>Department of Biochemistry and Cell Biology, Stony Brook University, Stony Brook, NY  
15 11794, USA.

16 <sup>4</sup>Department of Biology, University of North Carolina at Chapel Hill, Chapel Hill, North  
17 Carolina, USA

18 <sup>5</sup>Department of Molecular Biosciences, University of Texas at Austin, Austin, TX 78712,  
19 USA.

20 <sup>6</sup>Lineberger Comprehensive Cancer Center, University of North Carolina at Chapel Hill,  
21 Chapel Hill, North Carolina, USA

22

23 ‡Author for correspondence.

24

- 1 Running title: *C. elegans* AID system toolkit
- 2 Keywords: *C. elegans*, AID system, SapTrap, self-excising cassette, CRISPR/Cas9,
- 3 Transport Inhibitor Response 1,
- 4 Corresponding author contact information:
- 5 Dr. Jordan D. Ward
  
- 6 Department of Molecular, Cell, and Developmental Biology, University of California-
- 7 Santa Cruz, Santa Cruz, CA 95064, USA.
  
- 8 Office: (831) 502-2329
- 9 [jward2@ucsc.edu](mailto:jward2@ucsc.edu)

## 1 **Abstract**

2 The auxin-inducible degron (AID) system has emerged as a powerful tool to conditionally  
3 deplete proteins in a range of organisms and cell-types. Here, we describe a toolkit to  
4 augment the use of the AID system in *Caenorhabditis elegans*. We have generated a set  
5 of single-copy, tissue-specific (germline, intestine, neuron, muscle, hypodermis, seam  
6 cell, anchor cell) and pan-somatic *TIR1*-expressing strains carrying an equimolar co-  
7 expressed blue fluorescent reporter to enable use of both red and green channels in  
8 experiments. We have also constructed a set of plasmids to generate fluorescent  
9 protein::AID fusions through CRISPR/Cas9-mediated genome editing. These templates  
10 can be produced through frequently used cloning systems (Gibson assembly or SapTrap)  
11 or through ribonucleoprotein complex-mediated insertion of PCR-derived, linear repair  
12 templates. We have generated a set of sgRNA plasmids carrying modifications shown to  
13 boost editing efficiency, targeting standardized transgene insertion sites on  
14 chromosomes I and II. Together these reagents should complement existing *TIR1* strains  
15 and facilitate rapid and high-throughput fluorescent protein::AID\* tagging of factors of  
16 interest. This battery of new *TIR1*-expressing strains and modular, efficient cloning  
17 vectors serves as a platform for facile assembly of CRISPR/Cas9 repair templates for  
18 conditional protein depletion.

19

## 20 **Introduction**

21 Conditional degrons have emerged as a powerful tool to rapidly destroy proteins of  
22 interest in order to interrogate their function in cells and in multicellular animals (Natsume

1 and Kanemaki 2017). One of these tools, the auxin-inducible degron (AID) system, has  
2 been successfully employed in *C. elegans* (Zhang *et al.* 2015), budding yeast (Nishimura  
3 *et al.* 2009), *Drosophila* (Trost *et al.* 2016; Chen *et al.* 2018), zebrafish (Daniel *et al.* 2018),  
4 *Toxoplasma gondii* (Brown *et al.* 2017), cultured mammalian cells (Nishimura *et al.* 2009;  
5 Holland *et al.* 2012; Natsume *et al.* 2016), and mouse oocytes (Camlin and Evans 2019).  
6 The system is comprised of two components. First, a plant F-box protein named Transport  
7 Inhibitor Response 1 (TIR1) is expressed under the control of a promoter with a defined  
8 expression pattern (Figure 1). TIR1 can then interact with endogenous Skp1 and Cul1  
9 proteins to form a functional SCF E3 ubiquitin ligase complex (Figure 1). Second, an  
10 auxin-inducible degron (AID) sequence from the IAA17 protein is fused to a protein of  
11 interest (Figure 1) (Nishimura *et al.* 2009; Natsume and Kanemaki 2017). While the full  
12 length IAA17 sequence is 229 amino acids, minimal AID tags of 44 amino acids (AID\*)  
13 and 68 amino acids (mAID) have been developed (Morawska and Ulrich 2013; Li *et al.*  
14 2019). Addition of the plant hormone, auxin, promotes TIR1 binding to the degron, leading  
15 to the ubiquitination and subsequent proteasome-mediated degradation of the degron-  
16 tagged protein (Figure 1). In *C. elegans*, the *Arabidopsis thaliana* TIR1, AID\*, and mAID  
17 sequences are used (Zhang *et al.* 2015; Negishi *et al.* 2019), as this plant grows at a  
18 temperature range more similar to *C. elegans*; rice (*Oryza sativa*)-derived sequences are  
19 used in other systems (Nishimura *et al.* 2009; Natsume *et al.* 2016; Natsume and  
20 Kanemaki 2017).

21  
22 Here, we describe a new set of strains and reagents for *C. elegans* that complement the  
23 tools originally described by Zhang *et al.* (2015). We have generated a set of strains that



1 express single-copy, tissue-specific, all-in-one TIR1 cofactor, blue fluorescent  
2 *TIR1::F2A::mTagBFP2::AID\*::NLS* transgenes to enable protein depletion combined with  
3 imaging. The mTagBFP2 signal (hereafter referred to simply as “BFP”) serves as a built-  
4 in reporter and internal control for both TIR1 expression and AID-dependent activity. For  
5 many of the tissue-specific promoters driving this construct, we have created strains with  
6 insertions into standardized, neutral target sites on both chromosomes I and II (Frøkjær-  
7 Jensen *et al.* 2008; Frøkjær-Jensen *et al.* 2012), to facilitate crossing schemes. These  
8 strains expand experimental possibilities with green and red fluorescent proteins (FPs) of  
9 interest. For example, one could deplete a green FP::AID\*-tagged protein and test the  
10 effect on a red FP-tagged protein (or vice versa), or simultaneously deplete green  
11 FP::AID\*- and red FP::AID\*-tagged proteins of interest. One could also test the depletion  
12 of a non-tagged factor (e.g., via RNAi or CRISPR/Cas9-based mutagenesis) and monitor  
13 the levels and subcellular localization of a green or red FP::AID\*-tagged proteins prior to  
14 auxin addition. We have also generated constructs to introduce FP::AID\* tags into genes  
15 of interest using conventional genome editing approaches. We describe plasmid-based  
16 constructs, self-excising cassette selection vectors generated with either Gibson cloning  
17 or SapTrap, and injection of linear repair templates and Cas9 ribonucleoprotein  
18 complexes.

19

## 20 **Methods**

### 21 **Molecular Biology**

22 Unless otherwise stated, PCR was performed with Phusion polymerase purified in-house  
23 and 5x Phusion Green Buffer (Thermo Fisher, F538L). In the below constructs, flexible

1 linker sequences ranging from 5-9 glycine/serine residues are used to separate cassettes  
2 within constructs, i.e. AID\*, 3xFLAG, 3xMyc, TEV protease recognition sites, etc. Unless  
3 otherwise specified, pJW plasmids (Ward lab) were generated by Gibson cloning using  
4 an in-house made master mix, as described (Gibson *et al.* 2009). For two-fragment  
5 Gibson cloning 0.63  $\mu$ l of each DNA fragment was mixed with 3.75  $\mu$ l of the Gibson master  
6 mix and incubated for 1-4 hours at 50°C. Longer reaction times were used for inefficient  
7 assemblies. Reactions were then transformed as described in the supplemental methods  
8 or stored at -20°C. Detailed methods describing construct generation are provided in  
9 supplemental methods (Supplementary File 2). Oligos used to construct plasmids are  
10 listed in Table S1. Plasmids used to knock-in *promoter::TIR1::F2A::BFP::AID\*::NLS*  
11 sequences are listed in Table S2. All other plasmids are listed in Table S3. Primer design  
12 information for designing homology arms for Gibson and SapTrap cloning is provided in  
13 Supplementary File 3.

14

### 15 ***C. elegans***

16 *C. elegans* was cultured as originally described (Brenner 1974). The majority of genome  
17 editing was performed in N2 (wild type), EG9615 {*oxSi1091[mex-5p::Cas9(smu-2 introns)*  
18 *unc-119+] II; unc-119(ed3) III*}, or EG9882 (*F53A2.9{oxTi1127[mex-5p::cas9(+smu-2*  
19 *introns)]}, hsp-16.41p::Cre, Pmyo-2::2xNLS-CyOFP + lox2242 III*) animals (Table S4).  
20 EG9615 and EG9882 (unpublished) stably express Cas9 in the germline and are gifts  
21 from Dr. Matthew Schwartz and Dr. Erik Jorgensen. The *mex-5p* and *cdh-3p* strains were  
22 generated in specialized genetic backgrounds and then the TIR1 transgene was removed  
23 by outcrossing. Details are provided in Supplemental File 2. Strains expressing TIR1

1 generated through genome editing are listed in the table in Figure 3A. We note that we  
2 are reporting the final, SEC-excised strains in this table. We will also make the precursor  
3 strains containing the SEC available to the CGC for our *mex-5p* and *eft-3p* strains:  
4 JDW220 *wrdSi10[mex-5p::TIR1::F2A::BFP::tbb-2 3'UTR+SEC] I*, JDW222 *wrdSi8[mex-*  
5 *5p::TIR1::F2A::BFP::tbb-2 3'UTR + SEC] II*, and JDW224 *wrdSi22[eft-*  
6 *3p::TIR1::F2A::BFP::tbb-2 3'UTR+SEC] I*.

7

## 8 **CRISPR/Cas9-based genome editing**

9 All TIR1 strains were generated through SEC selection-based genome editing as  
10 previously described (Dickinson *et al.* 2015). Single-copy transgenes were inserted into  
11 the chromosome I and II loci where the ttTi4348 and ttTi5605 transposons are inserted  
12 for MosSCI (Frøkjær-Jensen *et al.* 2008; Frøkjær-Jensen *et al.* 2012), respectively. The  
13 genetic map positions for these insertions are provided in the genotype information. In  
14 Table S4, we detail the genetic background in which injections were performed, which  
15 Cas9 and sgRNA plasmids were used, and how many times the strains were outcrossed  
16 against an N2 background. Repair templates were used at 10 ng/μl and Cas9+sgRNA or  
17 sgRNA plasmids were used at 50 ng/μl.

18

## 19 **Auxin treatment**

20 For DQM623 (Figure 4) and JDW221, JDW225, and JDW229 (Figure S1), one-hour auxin  
21 treatments were performed. Worms were synchronized at the L1 larval stage by sodium  
22 hypochlorite treatment and moved to nematode growth media (NGM) plates seeded with

1 *E. coli* OP50. At the young adult stage, JDW221 worms were either kept on OP50-seeded  
2 NGM plates (control) or moved to plates treated with 1 mM K-NAA (Phyto-Technology  
3 Laboratories, N610) (Martinez and Matus 2020). At the mid-L3 larval stage, JDW225 and  
4 JDW229 worms were either kept on OP50-seeded NGM plates or moved to plates treated  
5 with 1 mM K-NAA. At the early L3, DQM623 worms were either kept on OP50-seeded  
6 NGM plates or moved to plates treated with 4 mM K-NAA. OP50-seeded NGM plates  
7 containing K-NAA were prepared as described (Martinez and Matus 2020). For LP869  
8 and LP871, mixed stage animals were transferred to 1 mM K-NAA NGM plates for 24  
9 hours and imaged as described.

10 For DV3799, DV3801, DV3803, and DV3805 (Figure 3), we made an auxin (IAA) (Alpha  
11 Aesar, #A10556) stock solution (400 mM in ethanol) and stored at 4°C for up to one  
12 month. A 16 mM auxin working solution was then prepared freshly by diluting 1:25 in  
13 filtered water with 4% ethanol final concentration. Animals were cultured on OP50 seeded  
14 on 60 mm NGM plates to the required stage, and 500 µL of 16 mM auxin was added to  
15 plate for a final concentration of 1 mM, with 4% ethanol as vehicle control (plates contain  
16 approximately 8 ml of agar). Animals were treated with auxin or vehicle for 3 hours before  
17 imaging.

18

## 19 **Microscopy**

20 For DQM623 in Figure 4 and JDW221, JDW225, and JDW229 in Figure S1, images were  
21 acquired on a custom-built upright spinning-disk confocal microscope consisting of a  
22 Zeiss Axio Imager.A2, a Borealis-modified Yokogawa CSU10 confocal scanner unit with  
23 50 mW, 405 nm lasers and 25 mW, 488 nm lasers, and a Hamamatsu Orca EM-CCD

1 camera. Images shown for JDW221 (pachytene region) were acquired using a Plan-  
2 Apochromat 40x/1.4 DIC objective. Images shown for DQM623 (AC), JDW225 (uterine  
3 and vulval tissues) and JDW229 (hypodermal cells) were acquired using a Plan-  
4 Apochromat 100x/1.4 DIC objective. MetaMorph software (version: 7.8.12.0) was used to  
5 automate acquisition. Worms were anesthetized on 5% agarose pads containing 7 mM  
6 NaN<sub>3</sub> and secured with a coverslip. Acquired images were processed through Fiji  
7 software (version: 2.0.0-rc-69/1.52p).

8 The LP869 and LP871 images (Figure S1) were taken using the 60x objective on a Nikon  
9 TiE stand with CSU-X1 spinning disk head (Yokogawa), 447 nm, 514 nm, and 561 nm  
10 solid state lasers, ImagEM EMCCD camera (Hamamatsu). Worms were anesthetized and  
11 images were processed as described above.

12 For strains DV3799, DV3800, DV3801, DV3803, DV3805, DV3825, and DV3826 (Figure  
13 3), animals were anaesthetized with 5 mM tetramisole. Images were acquired on a Nikon  
14 A1si Confocal Laser Microscope using a Plan-Apochromat 40x/1.4 DIC objective and DS-  
15 Fi2 camera. Images were analyzed using NIS Elements Advanced Research, Version  
16 4.40 software (Nikon).

17

## 18 **Statistical analysis**

19 Statistical significance was determined using a two-tailed unpaired Student's t-test.  $P <$   
20 0.05 was considered statistically significant. \*\*\*\* $P < 0.0001$ . The graph in Figure 4B was  
21 made using Prism software (version: 8.4.2.).

22

1

## 2 **Data availability**

3 Strains in Figure 3A will be made available through the *Caenorhabditis* Genetics Center.

4 Other strains and plasmids can be requested directly from the authors. The data that

5 support the findings of this study are available upon reasonable request. pDD356 and

6 pDD357 as well as plasmids described in Figures 5 and 6 will be made available through

7 Addgene. Supplemental files will be available on figshare.

8

## 9 **Results:**

10

### 11 **A new suite of TIR1 driver strains compatible with red FP imaging**

12 The initial description of the AID system in *C. elegans* used an mRuby2 fusion to monitor

13 the expression of TIR1 (Zhang *et al.* 2015). This feature was useful to monitor TIR1

14 localization and expression level in comparison to depletion of GFP::AID\* tagged

15 proteins. One limitation is that the TIR1::mRuby2 interferes with the imaging of factors

16 tagged with red FPs. Blue fluorescent proteins (BFPs) offer an appealing alternative as

17 reporters for TIR1 expression, since their emission spectra do not overlap with commonly

18 used green and red FPs (Lambert 2019). To report TIR1 localization and activity, we

19 placed an *F2A::BFP::AID\*::NLS* reporter downstream of the TIR1 transgene and drove

20 germline and embryo expression with a *sun-1* promoter (Figure 2). F2A is an example of

21 a 2A peptide, a virally derived ribosome skip sequence that allows production of multiple

22 polypeptides from a single mRNA (Ryan and Drew 1994; Ryan *et al.* 1999; Donnelly *et*

23 *al.* 2001; de Felipe *et al.* 2003). These sequences function effectively in *C. elegans* and

1 allow up to five proteins to be produced from a single mRNA (Ahier and Jarriault 2014).  
2 Transgenes were introduced in single copy through CRISPR/Cas9 editing and self-  
3 excising cassette (SEC) selection into neutral loci that support robust expression. We  
4 chose the sites in chromosomes I and II, respectively, where the ttTi4348 and ttTi5605  
5 transposons are inserted for MosSCI-based genome editing (Frøkjær-Jensen *et al.* 2008;  
6 Frøkjær-Jensen *et al.* 2012). These vectors are a useful counterpart to the MosSCI  
7 vectors; they allow introduction of transgenes into strains lacking Mos1 transposons, and  
8 thus can be inserted in any strain. The SEC strategy (Dickinson *et al.* 2015) first produces  
9 hygromycin resistant, rolling animals, which is useful for tracking the allele phenotypically  
10 in crosses. The loxP-flanked SEC is then excised by heat shock, producing the final  
11 wildtype-moving strain. As expected, this *sun-1p* construct drives nuclear-localized BFP  
12 in the germline and embryos, confirming the expression of the transgene (Figure 2B). We  
13 confirmed TIR1 activity by placing adult animals on 1 mM auxin and observing loss of  
14 BFP::AID\*::NLS (Figure 2B). We attempted to generate an equivalent construct where  
15 the *TIR1::F2A::BFP::AID\*::NLS* sequence was codon optimized and had piRNA sites  
16 removed, as this has been shown to improve expression of germline transgenes (Zhang  
17 *et al.* 2018a). Although we successfully generated single-copy insertions of this construct,  
18 we did not observe detectable expression of the piRNA-depleted  
19 TIR1::F2A::BFP::AID\*::NLS protein in any animals from three independent transgene  
20 insertion lines. We have not pursued whether these issues are due to transgene toxicity,  
21 silencing, or other potential issues.

22

1 Using our new TIR1 construct, we created a suite of strains with ubiquitous or tissue-  
2 specific TIR1 expression (Figure 3A). We created chromosome I and II knock-ins  
3 expressing TIR1 in the germline (*mex-5p* and *sun-1p*), hypodermis (*dpy-7p* and *col-10p*),  
4 muscle (*unc-54p*), and intestine (*ges-1p*) (Figure 3A, Figure S1). We also created  
5 chromosome I knock-ins expressing TIR1 in neurons (*rgef-1p*), somatic cells (*eft-3p*),  
6 body wall muscle (*myo-3p*), and excretory cell+hypodermis+gut (*vha-8p*) (Figure 3A,  
7 Figure S1). Our *vha-8p* strain also resulted in promoter expression in unidentified cells in  
8 the head. We also generated a strain expressing TIR1 in the seam cells using a minimal  
9 SCMP enhancer (gift from Prof. Allison Woollard) and a *pes-10* minimal promoter (Figure  
10 3A). While we saw robust seam cell expression in this strain, we also detected  
11 hypodermal expression (unpublished data). We are making this strain available to the  
12 community, but encourage careful evaluation before interpretation.

13  
14 An unanswered question is the importance of TIR1 expression levels for effective  
15 depletion of AID\*-tagged proteins. Motivated by an interest in NHR-25 (Ward *et al.* 2013;  
16 2014) and anchor cell invasion (Matus *et al.* 2015; Medwig and Matus 2017; Medwig-  
17 Kinney *et al.* 2020), we generated a strain to facilitate anchor cell (AC)-specific protein  
18 depletion (DQM623; Figure 3A). We observed no detectable BFP in this *cdh-*  
19 *3p::TIR1::F2A::BFP::AID\*::NLS* strain. To perform a functional test, we crossed in an *nhr-*  
20 *25::GFP::AID\*::3xFLAG* allele into the *cdh-3p::TIR1*. We had previously demonstrated  
21 significant depletion of NHR-25 in ACs and vulval precursor cells (VPCs) using a strongly  
22 expressed *eft-3p::TIR1::mRuby2* transgene (Martinez *et al.* 2020). Strikingly, we  
23 observed auxin-dependent depletion of NHR-25::GFP::AID\*::3xFLAG in the AC, while no



1 depletion was observed in the adjacent VPCs (Figure 4). Thus, even if the presence of  
2 TIR1 is undetectable through BFP reporter expression, there may still be sufficient  
3 amounts of TIR1 to deplete proteins of interest. We also made a strain designed to  
4 express TIR1 in both the soma and germline (*smu-1p*), as the *eft-3p* driven TIR1  
5 transgenes are typically silenced in the germline. We could not detect BFP expression in  
6 this *smu-1p* strain, but have made it available for the community to test. The majority of  
7 the TIR1 strains (17/19) we will deposit in the Caenorhabditis Genetics Center have  
8 detectable BFP expression that is lost when animals are shifted onto auxin plates,  
9 confirming TIR1 is active (Figures 2, 3 and Figure S1); the exceptions to this statement  
10 are the previously discussed *smu-1p* and *cdh-3p* TIR1 strains.

11

## 12 **Vectors to generate FP::AID\* knock-ins**

13 Currently, there are few vectors in repositories such as Addgene that allow facile  
14 customization of FP::AID\* repair templates for generating knock-ins into endogenous  
15 genes using CRISPR/Cas9-mediated genome editing. Zhang *et al.* (2015) described *unc-*  
16 *119* selectable linker::AID\*::GFP vectors, and Dickinson *et al.* (2018) generated two AID\*  
17 cassettes for the SapTrap system. We, therefore, created a set of vectors compatible with  
18 the most common genome-editing pipelines we use in our lab. First, we took a set of  
19 vectors that use Gibson assembly to generate SEC-selectable repair templates  
20 developed by Dickinson *et al.* (2015) and introduced AID\* sequences upstream of the  
21 3xFLAG epitope. This set of vectors allows for tagging genes with GFP, YPET, mKate2,  
22 and TagRFP-T along with AID\*::3xFLAG epitopes (Figure 5, Table S3). Methods in *C.*  
23 *elegans* using biotin ligases for protein affinity purification (Waaijers *et al.* 2016), proximity

1 labeling (Branon *et al.* 2018), native chromatin purification (Ooi *et al.* 2010), and cell-type  
2 specific nuclei purification (Steiner *et al.* 2012) have recently been developed. To support  
3 these approaches, we have made a set of FP<sup>SEC</sup>BioTag::AID\*::3xFLAG vectors. The  
4 BioTag sequence was the same as was used by Ooi *et al.* (2010) and Steiner *et al.* (2012),  
5 and we constructed vectors with GFP, TagRFP-T, and mKate2.

6  
7 We also have shifted to frequently using Cas9 RNP-based editing with linear repair  
8 templates, as this approach is cloning-free (Paix *et al.* 2014; 2015), and recent  
9 refinements have further boosted editing efficiency (Dokshin *et al.* 2018). We have  
10 generated plasmids with linker::GFP::AID\*::3xFLAG::linker (pJW2086),  
11 linker::GFP::3XFLAG::linker (pJW2088), and linker::mScarlet-I (germline-  
12 optimized)::3xMyc::linker (pJW2072) cassettes (Figure 5, Table S3). These vectors are  
13 suitable templates for PCR amplification to generate linear repair templates with short  
14 homology arms. FPs can be easily exchanged to generate new constructs by PCR  
15 linearization and Gibson cloning. Our standard approach is to include the AID\* tag on a  
16 GFP-tagged protein and examine the impact of depletion of this protein on a second  
17 mScarlet-I::3xMyc-tagged protein. Linkers flanking the FP allow flexibility in targeting  
18 genes of interest and reduce functional interference, permitting N-terminal, C-terminal, or  
19 internal tagging.

20  
21 Modifying the large, SEC-based selection cassettes for Gibson assembly was technically  
22 challenging as the size and repetitive *ccdB* sequences made these prone to  
23 recombination. The modularity of the type II restriction enzyme-based SapTrap cloning

1 pipeline was appealing as a method to rapidly develop new repair templates for  
2 CRISPR/Cas9-mediated genome editing (Figure 6A). Recent modifications to the system  
3 have made it compatible with SEC-based cloning (Dickinson *et al.* 2018), retaining an FP  
4 cassette and adding an SEC selection cassette. We generated a series of constructs for  
5 the SapTrap NT and CT slots, consisting of flexible linkers, various combinations of AID\*  
6 cassettes, and epitopes for protein purification or detection (3xMyc, 3xFLAG, BioTag  
7 (Figure 6B). We first attempted to generate a 30 amino acid  
8 linker::GFP^SEC^TEV::AID\*::3xFLAG construct to tag *lin-42* at the C-terminus. While we  
9 were able to produce the construct and obtain a knock-in strain (unpublished), our  
10 efficiency was very low, and we were unable to get correct assemblies by simply selecting  
11 colonies and sequencing. We, therefore, turned to colony PCR screening. Our standard  
12 practice of screening one assembly junction produced false positives, where one  
13 homology arm was correctly connected to the backbone and desired SapTrap cassettes,  
14 but the other arm was missing cassettes. We therefore screened both assembly junctions  
15 with the vector by colony PCR to identify correct clones, finding one correct assembly out  
16 of 48 colonies. As this efficiency was much lower than reported in the original SapTrap  
17 description (Schwartz and Jorgensen 2016), we obtained the reagents for generating an  
18 *snt-1::GFP* targeting vector (gift from Dr. Matt Schwartz and Dr. Erik Jorgensen). We  
19 obtained a similar assembly efficiency as reported (Schwartz and Jorgensen 2016),  
20 indicating that our efficiency issues were not due to our SapTrap reagents. In examining  
21 our colony PCR data for the *lin-42* construct, we occasionally noted the presence of bands  
22 smaller than the expected product. Sequencing the plasmid from these strains revealed  
23 partial assemblies of 2-3 blocks. We then PCR-amplified these partial assemblies to

1 restore the terminal SapI sites and connectors. Using these partial assembly blocks  
2 dramatically improved efficiency. To facilitate an SEC-based SapTrap assembly pipeline,  
3 we generated a series of “multi-cassettes,” where we combined fragments that we  
4 frequently use (Figure 6C, Table S3). We re-created the 30 amino acid  
5 linker::GFP<sup>SEC</sup>^TEV::AID\*::3xFLAG *lin-42* targeting construct using a multi-cassette,  
6 and our colony PCR hit rate jumped from 1/48 (2.1% (70.8%)) to 17/24. For our most  
7 commonly used vectors, we have generated constructs containing full assemblies of the  
8 knock-in epitope, lacking only the homology arms. PCR amplifying homology arms with  
9 SapI sites and appropriate connectors allows high-efficiency generation of repair  
10 templates.

11

## 12 **Additional vectors to support genome editing and gene expression studies**

13 We had previously shown that the “Flipped and extended (F+E)” sgRNA modifications  
14 that improved editing efficiency in mammalian cells (Chen *et al.* 2013) had a similar impact  
15 in *C. elegans* (Ward 2015). This modification was recently introduced into a SapTrap  
16 repair template vector that also contains a *U6p::sgRNA* cassette (Dickinson *et al.* 2018).  
17 We frequently used a separate sgRNA vector to reduce the number of fragments in an  
18 assembly and to allow us to increase the molar ratio of sgRNA vector to repair template.  
19 We generated SapTrap sgRNA RNA expression vectors using both commonly used U6  
20 promoters (pJW1838,pJW1839)), as it is currently unclear whether one promoter is  
21 broadly more active, (Friedland *et al.* 2013; Dickinson *et al.* 2013; Schwartz and  
22 Jorgensen 2016). One study reported that the K09B11.2 U6 promoter produces higher  
23 editing frequencies for a *sqt-1(sc1)* knock-in (Katic *et al.* 2015), while another study was

1 unable to generate *rol-6(su1006)* alleles using the K09B11.2 U6 promoter, but, instead,  
2 had success with the R07E5.16 promoter (Farboud and Meyer 2015)(Table S3). Our TIR1  
3 transgenes were inserted into the same standardized chromosomal loci frequently used  
4 for MosSCI-based generation of transgenes (ttTi4348 and ttTi5605) (Frøkjær-Jensen *et*  
5 *al.* 2008; Frøkjær-Jensen *et al.* 2012). We therefore created sgRNA(F+E vectors) for both  
6 U6 promoters for these two loci, as well as a third standardized locus (cxTi10882 insertion  
7 site) (pJW1849-1851; pJW1882-1884)(Frøkjær-Jensen *et al.* 2012). We have also  
8 generated vectors containing *eft-3p::Cas9+R07E5.16 U6p::sgRNA (F+E)* (Dickinson *et*  
9 *al.* 2013; Ward 2015) targeting the ttTi4348 and ttTi5605 insertion sites (pTD77 and  
10 pTD78, respectively). Finally, a set of germline optimized (Redemann *et al.* 2011; Wu *et*  
11 *al.* 2018) NLS::mScarlet-I vectors used as a cloning intermediate provide useful promoter  
12 reporter constructs. These Gibson-cloneable vectors come in versions that are  
13 promoterless (pJW1836), or have a *pes-10Δ* minimal promoter (pJW1841) for testing  
14 enhancers. We also made destabilized versions of these reporters by adding a PEST  
15 sequence (Loetscher *et al.* 1991), to allow monitoring of dynamic promoter activity  
16 (pJW1947,1948).

17

## 18 **Discussion:**

19 The AID system has allowed rapid, conditional, and tissue-specific depletion of tagged  
20 proteins in a wide range of organisms and cell types. Since its introduction to *C. elegans*  
21 (Zhang *et al.* 2015), it has been promptly adopted by the community. This system has  
22 allowed for rapid depletion of proteins in tissues that are refractory to RNA interference  
23 approaches, such as the germline (Pelisch *et al.* 2017; Shen *et al.* 2018; Zhang *et al.*

1 2018b), vulval precursor cells (Matus *et al.* 2014), and neurons (Liu *et al.* 2017; Patel  
2 and Hobert 2017; Serrano-Saiz *et al.* 2018). The system is also powerful for studying  
3 rapid developmental events such as molting (Zhang *et al.* 2015; Joseph *et al.* 2020),  
4 organogenesis (Martinez *et al.* 2020), and developmental timing (Azzi *et al.* 2020).  
5 Improvements to the auxin ligand have enhanced protein degradation in the embryo  
6 (Negishi *et al.* 2019) and removed the need for ethanol solubilization, instead allowing the  
7 auxin derivative to be dissolved in any aqueous buffer (Martinez *et al.* 2020). This soluble  
8 auxin was shown to be compatible with microfluidic devices, allowing long-term imaging  
9 coupled with targeted protein depletion (Martinez *et al.* 2020). Auxin-mediated depletion  
10 of a spermatogenesis regulator has been developed to conditionally sterilize animals, a  
11 valuable approach for the *C. elegans* aging field (Kasimatis *et al.* 2018). Given the  
12 emerging use of the AID system in *C. elegans*, it is important to continue to develop  
13 strains and reagents to facilitate usage.

14  
15 The original *C. elegans* AID system employed a TIR1::mRuby2 transgene, which was  
16 useful for visualizing TIR1 expression and cellular localization (Zhang *et al.* 2015).  
17 However, for applications where red fluorescent protein imaging is desired, the mRuby2  
18 expression could increase background and hamper imaging analysis. We therefore  
19 developed a complementary construct containing a *TIR1::F2A::BFP::AID\*::NLS*  
20 transgene (Figure 2). TIR1 is unlabeled, and nuclear-localized BFP provides an equimolar  
21 readout for TIR1 expression (Figure 2). AID\*-tagged BFP is degraded in the presence of  
22 auxin, confirming TIR1 activity via degradation of an internal control (Figure 2). The ability  
23 to read out TIR1 activity opens the door to performing suppressor screens for phenotypes

1 of interest generated using the AID system. Mutations in the TIR1 transgene or auxin  
2 transport factors could lead to unintended suppression of a mutant phenotype when  
3 performing such a screen. Therefore, being able to monitor TIR1 activity provides a  
4 secondary screen for such mutations. The vectors containing the  
5 *TIR1::F2A::BFP::AID\*::NLS* transgene are SEC-based vectors targeting the ttTi4348 and  
6 ttTi5605 insertion sites. These vectors contain unique restriction sites to remove  
7 promoters or even the entire transgene, facilitating creation of new TIR1 drivers or  
8 transgenes by Gibson assembly. The dominant *sqt-1(sc13)* marker in the SEC is useful  
9 for tracking loci during crosses via a roller phenotype and the SEC can easily be excised  
10 by heat shock, as previously described (Dickinson *et al.* 2015).

11  
12 We have also generated vectors compatible with commonly used cloning and genome  
13 editing protocols to facilitate knock-in of FP::AID\* constructs into genes of interest  
14 (Figures 5,6, Table S3). The set of Gibson-cloneable SEC vectors originally described by  
15 Dickinson *et al.* (2015) have been widely used, so we created modified versions  
16 containing AID\* and BioTag::AID\* cassettes (Figure 5). While we have not extensively  
17 tested the BioTag, it will be useful for streptavidin-based purification protocols developed  
18 by the community (Steiner *et al.* 2012; Steiner and Henikoff 2014; Waaijers *et al.* 2016;  
19 Branon *et al.* 2018). The strength of these vectors is that they provide easy, highly efficient  
20 assembly of repair templates for CRISPR/Cas9-mediated genome editing. One challenge  
21 in generating new versions of these vectors containing new fluorescent proteins or  
22 epitopes is that they are large and have repetitive sequences, making them prone to  
23 rearrangement. We turned to SapTrap, as the modular design and ligation-based cloning

1 should simplify integration of new FPs and epitopes. As we typically perform edits in a  
2 range of genetic backgrounds, we designed our constructs to use the SEC cassettes  
3 designed for the SapTrap system (Dickinson *et al.* 2018). In our first tests requiring  
4 assembly of nine pieces of DNA (two homology arms, sgRNA, four cassettes, two plasmid  
5 backbone fragments), we had poor efficiency and required screening of two assembly  
6 junctions by colony PCR to identify a single correct assembly out of 48 colonies. While  
7 the SEC-based version of SapTrap was less efficient than Gibson cloning (~60% vs. 30%)  
8 (Dickinson *et al.* 2018), it was still much higher than the efficiencies we initially observed.  
9 In screening our reactions, we would occasionally identify partial assemblies (i.e. 5'  
10 homology arm+CT cassette). By cloning out these partial assemblies to reduce the  
11 number of fragments, we boosted our assembly efficiencies. We then shifted to create  
12 multi-cassettes, which minimize the number of ligations required to successfully assemble  
13 the final vector. Additionally, by expressing our sgRNA on a separate plasmid, only four  
14 pieces of DNA need to be assembled in all, boosting efficiency (backbone, 5' homology  
15 arm, 3' homology arm, multi-cassette). We also provide methods for the community to  
16 build new multi-cassettes for highly used FP-epitope combinations. Finally, we generated  
17 a set of vectors for making linear repair templates by Cas9 RNPs (Figure 5). The  
18 advantage of this approach is that it does not require cloning and has high reported  
19 efficiencies (Paix *et al.* 2014; 2015; Dokshin *et al.* 2018). These vectors contain N- and  
20 C-terminal flexible linkers so that they can be used for tagging proteins of interest at the  
21 N-terminus, C-terminus, or internally. The small size of these plasmids allows FPs and  
22 epitopes to easily be exchanged by Gibson cloning. Together, this collection of vectors  
23 should facilitate efficient generation of new *FP::AID\**-tagged genes.



1  
2 For many applications, the AID system offers a powerful method to conditionally degrade  
3 proteins in specific tissues and at specific points in development. However, as the system  
4 has gained popularity, particular challenges have emerged. While they do not dampen  
5 our enthusiasm for the AID system, it is important to be aware of them. Here, we also  
6 discuss potential solutions to these issues. It has become clear that in certain cases there  
7 can be auxin-independent, TIR1-dependent degradation of AID-tagged proteins. This  
8 unwanted basal degradation occurs with both the minimized and full-length AID  
9 sequence. In mammalian cells, a recent report found 3-15% depletion of AID-tagged  
10 proteins in the absence of auxin when TIR1 is co-expressed (Sathyan *et al.* 2019). This  
11 auxin-independent degradation can be extreme: in human cell lines, tagging the  
12 centromeric histone chaperone HJURP with AID resulted in over 90% depletion in the  
13 absence of auxin (Zasadzińska *et al.* 2018). In line with these findings, in *C. elegans* RNAi  
14 depletion of the Cullin-1 gene, *cul-1*, increased expression of a GFP::AID reporter by 19%  
15 in the absence of auxin and presence of TIR1 (Martinez *et al.* 2020). Martinez *et al.* (2020)  
16 also reported 22-35% depletion of AID-tagged *C. elegans* proteins in an auxin-  
17 independent, TIR1-dependent manner, while another study observed 70-75% depletion  
18 (Schiksnis *et al.* 2020). Currently, the determinants of a protein's sensitivity to auxin-  
19 independent degradation are unclear. Sathyan *et al.* (2019) reported that the addition of  
20 another component of the auxin signaling pathway, ARF19, blocked this auxin-  
21 independent degradation of AID-tagged proteins and in fact sped up degradation kinetics  
22 in the presence of auxin. ARF19 is an AID interaction partner and is thought to shield the  
23 tagged protein from TIR1 in the absence of auxin. It may be useful to test whether ARF19

1 improves performance of the AID system in *C. elegans*. One important caveat is that the  
2 authors used a full-length AID tag. The miniAID and AID\* tags frequently used in *C.*  
3 *elegans* lack domains III and IV of the protein which are thought to be important for the  
4 ARF19 interaction. Full-length AID is 229 amino acids, a substantially larger tag that  
5 would necessitate further study to ensure it did not interfere with fusion proteins. Another  
6 approach could be a recently described AID system comprised of *Arabidopsis thaliana*  
7 AFB2 and a minimal degron from IAA7, which was reported to minimize basal degradation  
8 (Li *et al.* 2019). Our set of vectors will allow modular assembly of any new AID system  
9 component and facile integration of any new reagents. We note that engineering an  
10 improved TIR1 that did not promote auxin-independent degradation of miniAID-tagged  
11 proteins would be most desirable. A strong candidate is a recently described TIR1 (F79A)  
12 mutation and modified auxin that had 1000-fold stronger binding, reducing the amount of  
13 auxin required for target knockdown (Nishimura *et al.* 2020). This reagent would be  
14 compatible with and improve the performance of the collection of miniAID- and AID\*-  
15 tagged strains which the *C. elegans* community has already generated.

16

17 We previously used the AID system to deplete the nuclear hormone receptor NHR-23  
18 and reported a larval arrest phenotype similar to a previously-described null allele, and  
19 depletion of NHR-23 within 20 minutes of auxin exposure (Kouns *et al.* 2011; Zhang *et*  
20 *al.* 2015). This result highlights the potential of the AID system for rapid depletion of  
21 proteins of interest. However, AID-mediated protein depletion may not always produce  
22 strong hypomorphic or null phenotypes. Serrano-Saiz *et al.* reported that with an *unc-*  
23 *86::mNeonGreen::AID* allele combined with ubiquitously-expressed TIR1 via a strong *eft-*

1 3 promoter, and continuous exposure to 4 mM auxin, they failed to observe the phenotype  
2 of strong loss-of-function or null alleles. Despite a complete loss of mNeonGreen  
3 expression via confocal microscopy, they only observed phenotypes consistent with an  
4 *unc-86* hypomorph (Serrano-Saiz *et al.* 2018). In interpreting the extent of depletion by  
5 microscopy, one must consider the limit of detection and fluorophore maturation time. In  
6 adult males, a GFP::AID\*::3xFLAG tagged allele of NHR-23 is only detectable in the  
7 germline (manuscript in preparation). When we use a germline-specific TIR1 to deplete  
8 NHR-23, by microscopy we observed no detectable expression following auxin exposure  
9 (manuscript in preparation). However, ~30% of protein remains as detected by western  
10 blot (manuscript in preparation). A similar inability to obtain null phenotypes using the AID  
11 system was observed using an *unc-3::mNeonGreen::AID\** (Patel and Hobert 2017) allele  
12 and a *daf-15::mNeonGreen::AID\** allele (Duong *et al.* 2020). In addition, the  
13 mNeonGreen::AID\* tag caused a mild hypomorph of *unc-3* in the absence of TIR1 and  
14 auxin, suggesting that the presence of the AID\* tag was interfering with protein levels  
15 (Patel and Hobert 2017). The inability of target protein depletion to produce a null  
16 phenotype has been encountered for several other neuronal identity genes (Oliver  
17 Hobert, personal communication). In yeast, fusion of the Skp1 subunit of the SCF  
18 ubiquitin ligase to TIR1 has resulted in enhanced degradation efficiency of AID-tagged  
19 proteins (Kanke *et al.* 2011). Such an approach is worth testing in *C. elegans*. More  
20 examples are needed to assess the likely mechanism of TIR1-independent, auxin-  
21 independent inactivation of target proteins. It would be important to determine if the AID  
22 tag affects protein levels and localization in these cases. RNAi of *cul-1* or proteasome  
23 inhibition could test whether an endogenous ubiquitin ligase could interact with the AID

1 tag in the absence of TIR1. Additionally, more information is required to determine rules  
2 for optimal AID tag placement in both structured and unstructured domains of proteins.  
3 As a precaution, we tend to use long 10-30 amino acid flexible linker sequences to space  
4 the AID\* tag away from the protein of interest.

5  
6 Intuitively, one might assume that TIR1 levels correlate with degradation efficiency.  
7 Indeed, evidence supports stronger depletion of AID\*-tagged proteins when using TIR1  
8 expressed from multi-copy arrays compared to single-copy transgenes (O. Hobert,  
9 personal communication). It will be important for groups to note expression levels of their  
10 AID fusion protein and the tissue-specific promoter when assessing efficiency of  
11 depletion. Mining a single-cell RNA-seq (scRNA-seq) datasets from L2 larvae (Cao *et al.*  
12 2017), embryos (Tintori *et al.* 2016; Packer *et al.* 2019), and ideally, future stage-specific  
13 scRNA-seq datasets would allow identification of new, strongly expressed tissue-specific  
14 promoters. Other approaches to increasing the expression levels of tissue-specific  
15 promoters could be integrating arrays. Such an approach was required for optimal  
16 performance of the cGal system (Wang *et al.* 2017). A recent approach using CRISPR to  
17 allow site-specific integration of arrays could allow new multicopy TIR1 drivers to be  
18 inserted at specific chromosomal loci (Yoshina *et al.* 2016). Alternatively, multicopy  
19 tissue-specific Gal4 strains could be used to drive tissue-specific expression of  
20 UAS::TIR1, though this would increase the complexity of crosses to create new strains.  
21 However, we also note that effective depletion is possible even when TIR1 levels are low  
22 enough where the BFP reporter is undetectable (Figure 4). This result highlights the

1 importance of functionally testing new TIR1 transgenes with FP::AID\*-tagged alleles of  
2 interest.

3  
4 The ability to rapidly deplete proteins with temporal and cellular resolution allows precise  
5 dissection of the roles of gene products in developmental processes of interest. With the  
6 ever-increasing efficiency of genome editing and continued refinement of the AID system,  
7 one can envision creating libraries of FP::AID\*-tagged genes covering the genome and a  
8 bank of TIR1 strains to allow depletion in virtually all cell types.

## 11 **Acknowledgments**

12 Many thanks to Matthew Schwartz for providing reagents and suggestions to get the  
13 SapTrap system established in our lab. We thank Oliver Hobert, Troy McDiarmid, and  
14 Francis McNally for helpful discussions about the AID system. We thank Alison Woollard  
15 for sharing unpublished information about a minimal SCM enhancer. G.A., M.T.L., H.N.S.,  
16 B.D., J.M.R., and J.D.W. are supported by the NIH/NIGMS [R00GM-107345]. J.D.H. is  
17 supported by F32 GM131577, J.D.H. and B.G. are supported by R35 GM134838, and  
18 T.D. and D.J.R are supported by R01 GM121625. D.Q.M. is supported by the NIH NIGMS  
19 [1R01GM121597]. D.Q.M. is also a Damon Runyon-Rachleff Innovator supported (in part)  
20 by the Damon Runyon Cancer Research Foundation [DRR-47-17]. M.A.Q.M. is supported  
21 by the NIGMS [3R01GM121597-02S2]. N.J.P. is supported by the American Cancer  
22 Society [132969-PF-18-226-01-CSM]. T.N.M. is supported by the NICHD

1 [F31HD100091]. Some strains were provided by the *Caenorhabditis* Genetics Center,  
2 which is funded by the NIH Office of Research Infrastructure Programs [P40 OD010440].

3

#### 4 **AUTHOR CONTRIBUTIONS**

5 D.J.D. designed the built-in F2A::BFP::AID\*::NLS reporter strategy for TIR1 expression  
6 and activity. G.A, T.D., M.L., M.A.Q.M., J.D.H, N.J.P., D.Q.M., D.J.D., D.J.R., and J.D.W.  
7 conceived and designed the experiments. G.A. T.D., R.D., J.D.H., W.Z., T.N.M.-K.,  
8 S.S.S., D.Q.M., D.J.D., D.J.R., and J.D.W. designed the constructs. T.D., J.D.H., R.D.,  
9 N.J.P., J.M.R, and D.J.D. performed the microinjections. G.A., T.D., M.L., M.A.Q.M.,  
10 J.D.H., N.J.P., and D.J.D. performed the crosses and characterized strains. G.A., T.D.,  
11 M.L., R.D., M.A.Q.M., J.D.H., H.N.S., N.J.P., R.M., B.D., J.M.R., and D.J.D. performed  
12 the experiments. G.A., T.D., M.A.Q.M., J.D.H., N.J.P., D.Q.M., D.J.D., D.J.R., and  
13 J.D.W. analyzed and quantified the data. G.A. and J.D.W. wrote the manuscript with  
14 contributions from the other authors. The authors declare no competing interests.

15

#### 16 **Literature Cited**

17 Ahier A., Jarriault S., 2014 Simultaneous Expression of Multiple Proteins Under a Single  
18 Promoter in *Caenorhabditis elegans* via a Versatile 2A-Based Toolkit. *Genetics* **196**:  
19 605–613.

20 Azzi C., Aeschimann F., Neagu A., Großhans H., 2020 A branched heterochronic  
21 pathway directs juvenile-to-adult transition through two LIN-29 isoforms. *eLife* **9**.

- 1 Branon T. C., Bosch J. A., Sanchez A. D., Udeshi N. D., Svinkina T., Carr S. A.,  
2 Feldman J. L., Perrimon N., Ting A. Y., 2018 Efficient proximity labeling in living  
3 cells and organisms with TurboID. *Nat Biotechnol* **36**: 880–887.
- 4 Brown K. M., Long S., Sibley L. D., 2017 Plasma Membrane Association by N-Acylation  
5 Governs PKG Function in *Toxoplasma gondii*. *mBio* **8**.
- 6 Camlin N. J., Evans J. P., 2019 Auxin-inducible protein degradation as a novel  
7 approach for protein depletion and reverse genetic discoveries in mammalian  
8 oocytes. *Biology of Reproduction* **101**: 704–718.
- 9 Cao J., Packer J. S., Ramani V., Cusanovich D. A., Huynh C., Daza R., Qiu X., Lee C.,  
10 Furlan S. N., Steemers F. J., Adey A., Waterston R. H., Trapnell C., Shendure J.,  
11 2017 Comprehensive single-cell transcriptional profiling of a multicellular organism.  
12 *Science* **357**: 661–667.
- 13 Chen B., Gilbert L. A., Cimini B. A., Schnitzbauer J., Zhang W., Li G.-W., Park J.,  
14 Blackburn E. H., Weissman J. S., Qi L. S., Huang B., 2013 Dynamic Imaging of  
15 Genomic Loci in Living Human Cells by an Optimized CRISPR/Cas System. *Cell*  
16 **155**: 1479–1491.
- 17 Chen W., Werdann M., Zhang Y., 2018 The auxin-inducible degradation system  
18 enables conditional PERIOD protein depletion in the nervous system of *Drosophila*  
19 *melanogaster*. *FEBS J.* **285**: 4378–4393.

- 1 Daniel K., Icha J., Horenburg C., Müller D., Norden C., Mansfeld J., 2018 Conditional  
2 control of fluorescent protein degradation by an auxin-dependent nanobody. *Nature*  
3 *Communications* **9**: 3297–13.
- 4 de Felipe P., Hughes L. E., Ryan M. D., Brown J. D., 2003 Co-translational,  
5 Intraribosomal Cleavage of Polypeptides by the Foot-and-mouth Disease Virus 2A  
6 Peptide. *J Biol Chem* **278**: 11441–11448.
- 7 Dickinson D. J., Pani A. M., Heppert J. K., Higgins C. D., Goldstein B., 2015  
8 Streamlined Genome Engineering with a Self-Excising Drug Selection Cassette.  
9 *Genetics* **200**: 1035–1049.
- 10 Dickinson D. J., Slabodnick M. M., Chen A. H., Goldstein B., 2018 SapTrap assembly of  
11 repair templates for Cas9-triggered homologous recombination with a self-excising  
12 cassette. *microPublication Biology*. 10.17912/W2KT0N
- 13 Dickinson D. J., Ward J. D., Reiner D. J., Goldstein B., 2013 Engineering the  
14 *Caenorhabditis elegans* genome using Cas9-triggered homologous recombination.  
15 *Nat Meth* **10**: 1028–1034.
- 16 Dokshin G. A., Ghanta K. S., Piscopo K. M., Mello C. C., 2018 Robust Genome Editing  
17 with Short Single-Stranded and Long, Partially Single-Stranded DNA Donors in  
18 *Caenorhabditis elegans*. *Genetics* **210**: 781–787.
- 19 Donnelly M. L. L., Luke G., Mehrotra A., Li X., Hughes L. E., Gani D., Ryan M. D., 2001  
20 Analysis of the aphthovirus 2A/2B polyprotein 'cleavage' mechanism indicates not a



- 1 proteolytic reaction, but a novel translational effect: a putative ribosomal 'skip'. J.  
2 Gen. Virol. **82**: 1013–1025.
- 3 Duong T., Rasmussen N. R., Ballato E., Mote F. S., Reiner D. J., 2020 The Rheb-  
4 TORC1 signaling axis functions as a developmental checkpoint. Development **147**:  
5 dev181727.
- 6 Farboud B., Meyer B. J., 2015 Dramatic Enhancement of Genome Editing by  
7 CRISPR/Cas9 Through Improved Guide RNA Design. Genetics **199**: 959–971.
- 8 Friedland A. E., Tzur Y. B., Esvelt K. M., Colaiácovo M. P., Church G. M., Calarco J. A.,  
9 2013 Heritable genome editing in *C. elegans* via a CRISPR-Cas9 system. Nat Meth  
10 **10**: 741–743.
- 11 Frøkjær-Jensen C., Davis M. W., Hopkins C. E., Newman B. J., Thummel J. M., Olesen  
12 S.-P., Grunnet M., Jorgensen E. M., 2008 Single-copy insertion of transgenes in  
13 *Caenorhabditis elegans*. Nat Genet **40**: 1375–1383.
- 14 Frøkjær-Jensen C., Davis M. W., Ailion M., Jorgensen E. M., 2012 Improved Mos1-  
15 mediated transgenesis in *C. elegans*. Nat Meth **9**: 117–118.
- 16 Gibson D. G., Young L., Chuang R.-Y., Venter J. C., Hutchison C. A., Smith H. O., 2009  
17 Enzymatic assembly of DNA molecules up to several hundred kilobases. Nat Meth  
18 **6**: 343–345.

- 1 Holland A. J., Fachinetti D., Han J. S., Cleveland D. W., 2012 Inducible, reversible  
2 system for the rapid and complete degradation of proteins in mammalian cells.  
3 *Proceedings of the National Academy of Sciences* **109**: E3350–7.
- 4 Joseph B. B., Wang Y., Edeen P., Lažetić V., Grant B. D., Fay D. S., 2020 Control of  
5 clathrin-mediated endocytosis by NIMA family kinases. *PLoS Genet* **16**: e1008633.
- 6 Kanke M., Nishimura K., Kanemaki M., Kakimoto T., Takahashi T. S., Nakagawa T.,  
7 Masukata H., 2011 Auxin-inducible protein depletion system in fission yeast. *BMC*  
8 *Cell Biology* **12**: 8.
- 9 Kasimatis K. R., Moerdyk-Schauwecker M. J., Phillips P. C., 2018 Auxin-Mediated  
10 Sterility Induction System for Longevity and Mating Studies in *Caenorhabditis*  
11 *elegans*. *G3 Genes, Genomes. Genet* **8**: 2655–2662.
- 12 Katic I., Xu L., Ciosk R., 2015 CRISPR/Cas9 Genome Editing in *Caenorhabditis*  
13 *elegans*: Evaluation of Templates for Homology-Mediated Repair and Knock-Ins by  
14 Homology-Independent DNA Repair. *G3 Genes, Genomes. Genet* **5**: 1649–1656.
- 15 Kouns N. A., Nakielna J., Behensky F., Krause M. W., Kostrouch Z., Kostrouchová M.,  
16 2011 NHR-23 dependent collagen and hedgehog-related genes required for  
17 molting. *Biochemical and Biophysical Research Communications* **413**: 515–520.
- 18 Lambert T. J., 2019 FPbase: a community-editable fluorescent protein database. *Nat*  
19 *Meth* **16**: 277–278.

- 1 Li S., Prasanna X., Salo V. T., Vattulainen I., Ikonen E., 2019 An efficient auxin-  
2 inducible degron system with low basal degradation in human cells. *Nat Meth* **16**:  
3 866–869.
- 4 Liu P., Chen B., Mailler R., Wang Z.-W., 2017 Antidromic-rectifying gap junctions  
5 amplify chemical transmission at functionally mixed electrical-chemical synapses.  
6 *Nature Communications* **8**: 14818–16.
- 7 Loetscher P., Pratt G., Rechsteiner M., 1991 The C terminus of mouse ornithine  
8 decarboxylase confers rapid degradation on dihydrofolate reductase. Support for the  
9 pest hypothesis. *J Biol Chem* **266**: 11213–11220.
- 10 Martinez M. A. Q., Kinney B. A., Medwig-Kinney T. N., Ashley G., Ragle J. M., Johnson  
11 L., Aguilera J., Hammell C. M., Ward J. D., Matus D. Q., 2020 Rapid Degradation of  
12 *Caenorhabditis elegans* Proteins at Single-Cell Resolution with a Synthetic Auxin.  
13 *G3 Genes, Genomes. Genet* **10**: 267–280.
- 14 Martinez M., Matus D. Q., 2020 Auxin-mediated Protein Degradation in *Caenorhabditis*  
15 *elegans*. *Bio-protocol* **10**: e3589.
- 16 Matus D. Q., Chang E., Makohon-Moore S. C., Hagedorn M. A., Chi Q., Sherwood D.  
17 R., 2014 Cell division and targeted cell cycle arrest opens and stabilizes basement  
18 membrane gaps. *Nature Communications* **5**: 4184–13.
- 19 Matus D. Q., Lohmer L. L., Kelley L. C., Schindler A. J., Kohrman A. Q., Barkoulas M.,  
20 Zhang W., Chi Q., Sherwood D. R., 2015 Invasive Cell Fate Requires G1 Cell-Cycle

- 1 Arrest and Histone Deacetylase-Mediated Changes in Gene Expression. *Dev Cell*  
2 **35**: 162–174.
- 3 Medwig T. N., Matus D. Q., 2017 Breaking down barriers: the evolution of cell invasion.  
4 *Current Opinion in Genetics & Development* **47**: 33–40.
- 5 Medwig-Kinney T. N., Smith J. J., Palmisano N. J., Tank S., Zhang W., Matus D. Q.,  
6 2020 A developmental gene regulatory network for *C. elegans* anchor cell invasion.  
7 *Development* **147**.
- 8 Morawska M., Ulrich H. D., 2013 An expanded tool kit for the auxin-inducible degron  
9 system in budding yeast. *Yeast* **30**: 341–351.
- 10 Natsume T., Kanemaki M. T., 2017 Conditional Degrons for Controlling Protein  
11 Expression at the Protein Level. *Annu Rev Genet* **51**: 83–102.
- 12 Natsume T., Kiyomitsu T., Saga Y., Kanemaki M. T., 2016 Rapid Protein Depletion in  
13 Human Cells by Auxin-Inducible Degron Tagging with Short Homology Donors. *Cell*  
14 *Reports* **15**: 210–218.
- 15 Negishi T., Asakawa M., Kanemaki M. T., Sawa H., 2019 Modified auxin improves the  
16 auxin-inducible degradation (AID) system for laid *C. elegans* embryos.  
17 *microPublication Biology* **2019**: 1–4.
- 18 Nishimura K., Fukagawa T., Takisawa H., Kakimoto T., Kanemaki M., 2009 An auxin-  
19 based degron system for the rapid depletion of proteins in nonplant cells. *Nat Meth*  
20 **6**: 917–922.

- 1 Nishimura K., Yamada R., Hagihara S., Iwasaki R., Uchida N., Kamura T., Takahashi  
2 K., Torii K. U., Fukagawa T., 2020 A super sensitive auxin-inducible degron system  
3 with an engineered auxin-TIR1 pair. *bioRxiv* **59**: 1538–14.
- 4 Ooi S.-L., Henikoff J. G., Henikoff S., 2010 A native chromatin purification system for  
5 epigenomic profiling in *Caenorhabditis elegans*. *Nucleic Acids Res* **38**: e26–e26.
- 6 Packer J. S., Zhu Q., Huynh C., Sivaramakrishnan P., Preston E., Dueck H., Stefanik  
7 D., Tan K., Trapnell C., Kim J., Waterston R. H., Murray J. I., 2019 A lineage-  
8 resolved molecular atlas of *C. elegans* embryogenesis at single-cell resolution.  
9 *Science* **365**.
- 10 Paix A., Folkmann A., Rasoloson D., Seydoux G., 2015 High Efficiency, Homology-  
11 Directed Genome Editing in *Caenorhabditis elegans* Using CRISPR-Cas9  
12 Ribonucleoprotein Complexes. *Genetics* **201**: 47–54.
- 13 Paix A., Wang Y., Smith H. E., Lee C.-Y. S., Calidas D., Lu T., Smith J., Schmidt H.,  
14 Krause M. W., Seydoux G., 2014 Scalable and versatile genome editing using linear  
15 DNAs with microhomology to Cas9 Sites in *Caenorhabditis elegans*. *Genetics* **198**:  
16 1347–1356.
- 17 Patel T., Hobert O., 2017 Coordinated control of terminal differentiation and restriction  
18 of cellular plasticity. *eLife* **6**: 249.

- 1 Pelisch F., Tammsalu T., Wang B., Jaffray E. G., Gartner A., Hay R. T., 2017 A SUMO-  
2 Dependent Protein Network Regulates Chromosome Congression during Oocyte  
3 Meiosis. *Mol Cell* **65**: 66–77.
- 4 Redemann S., Schloissnig S., Ernst S., Pozniakowsky A., Ayloo S., Hyman A. A.,  
5 Bringmann H., 2011 Codon adaptation–based control of protein expression in *C.*  
6 *elegans*. *Nat Meth* **8**: 250–252.
- 7 Ryan M. D., Drew J., 1994 Foot-and-mouth disease virus 2A oligopeptide mediated  
8 cleavage of an artificial polyprotein. *EMBO J* **13**: 928–933.
- 9 Ryan M. D., Donnelly M., Lewis A., Bioorganic A. M., 1999, 1999 A model for  
10 nonstoichiometric, cotranslational protein scission in eukaryotic ribosomes.  
11 *Bioinorganic Chemistry* **27**: 55–79.
- 12 Sathyan K. M., McKenna B. D., Anderson W. D., Duarte F. M., Core L., Guertin M. J.,  
13 2019 An improved auxin-inducible degron system preserves native protein levels  
14 and enables rapid and specific protein depletion. *Genes Dev* **33**: 1441–1455.
- 15 Schiksnis E. C., Nicholson A. L., Modena M. S., Pule M. N., 2020 Auxin-independent  
16 depletion of degron-tagged proteins by TIR1. *microPublication Biology*.  
17 *microPublication Biology*. 10.17912/micropub.biology.000213
- 18 Schwartz M. L., Jorgensen E. M., 2016 SapTrap, a Toolkit for High-Throughput  
19 CRISPR/Cas9 Gene Modification in *Caenorhabditis elegans*. *Genetics* **202**: 1277–  
20 1288.

- 1 Serrano-Saiz E., Leyva-Díaz E., La Cruz De E., Hobert O., 2018 BRN3-type POU  
2 Homeobox Genes Maintain the Identity of Mature Postmitotic Neurons in  
3 Nematodes and Mice. *Curr Biol* **28**: 2813–2823.e2.
- 4 Shen E.-Z., Chen H., Ozturk A. R., Tu S., Shirayama M., Tang W., Ding Y.-H., Dai S.-  
5 Y., Weng Z., Mello C. C., 2018 Identification of piRNA Binding Sites Reveals the  
6 Argonaute Regulatory Landscape of the *C. elegans* Germline. *Cell* **172**: 937–  
7 951.e18.
- 8 Steiner F. A., Henikoff S., 2014 Cell Type-Specific Affinity Purification of Nuclei for  
9 Chromatin Profiling in Whole Animals. In: *Methods in Molecular Biology*, Methods in  
10 Molecular Biology. Springer New York, New York, NY, pp. 3–14.
- 11 Steiner F. A., Talbert P. B., Kasinathan S., Deal R. B., Henikoff S., 2012 Cell-type-  
12 specific nuclei purification from whole animals for genome-wide expression and  
13 chromatin profiling. *Genome Res* **22**: 766–777.
- 14 Tintori S. C., Osborne Nishimura E., Golden P., Lieb J. D., Goldstein B., 2016 A  
15 Transcriptional Lineage of the Early *C. elegans* Embryo. *Dev Cell* **38**: 430–444.
- 16 Trost M., Blattner A. C., Leo S., Lehner C. F., 2016 *Drosophila dany* is essential for  
17 transcriptional control and nuclear architecture in spermatocytes. *Development* **143**:  
18 2664–2676.
- 19 Waaijers S., Muñoz J., Berends C., Ramalho J. J., Goerdal S. S., Low T. Y.,  
20 Zoumaro-Djayoon A. D., Hoffmann M., Koorman T., Tas R. P., Harterink M., Seelk

- 1 S., Kerver J., Hoogenraad C. C., Bossinger O., Tursun B., Van Den Heuvel S., Heck  
2 A. J. R., Boxem M., 2016 A tissue-specific protein purification approach in  
3 *Caenorhabditis elegans* identifies novel interaction partners of DLG-1/Discs large.  
4 BMC Biology **14**: 66–24.
- 5 Wang H., Liu J., Gharib S., Chai C. M., Schwarz E. M., Pokala N., Sternberg P. W.,  
6 2017 cGAL, a temperature-robust GAL4-UAS system for *Caenorhabditis elegans*.  
7 Nat Meth **14**: 145–148.
- 8 Ward J. D., 2015 Rapid and Precise Engineering of the *Caenorhabditis elegans*  
9 Genome with Lethal Mutation Co-Conversion and Inactivation of NHEJ Repair.  
10 Genetics **199**: 363–377.
- 11 Ward J. D., Bojanala N., Bernal T., Ashrafi K., Asahina M., Yamamoto K. R., 2013  
12 Sumoylated NHR-25/NR5A Regulates Cell Fate during *C. elegans* Vulval  
13 Development. PLoS Genet **9**: e1003992.
- 14 Ward J. D., Mullaney B., Schiller B. J., He L. D., Petnic S. E., Couillault C., Pujol N.,  
15 Bernal T. U., Van Gilst M. R., Ashrafi K., Ewbank J. J., Yamamoto K. R., 2014  
16 Defects in the *C. elegans* acyl-CoA Synthase, *acs-3*, and Nuclear Hormone  
17 Receptor, *nhr-25*, Cause Sensitivity to Distinct, but Overlapping Stresses. PLoS  
18 ONE **9**: e92552.



- 1 Wu W.-S., Huang W.-C., Brown J. S., Zhang D., Song X., Chen H., Tu S., Weng Z., Lee  
2 H.-C., 2018 pirScan: a webserver to predict piRNA targeting sites and to avoid  
3 transgene silencing in *C. elegans*. *Nucleic Acids Res* **46**: W43–W48.
- 4 Yoshina S., Suehiro Y., Kage-Nakadai E., Mitani S., 2016 Locus-specific integration of  
5 extrachromosomal transgenes in *C. elegans* with the CRISPR/Cas9 system.  
6 *Biochemistry and Biophysics Reports* **5**: 70–76.
- 7 Zasadzińska E., Huang J., Bailey A. O., Guo L. Y., Lee N. S., Srivastava S., Wong K.  
8 A., French B. T., Black B. E., Foltz D. R., 2018 Inheritance of CENP-A Nucleosomes  
9 during DNA Replication Requires HJURP. *Dev Cell* **47**: 348–362.e7.
- 10 Zhang D., Tu S., Stubna M., Wu W.-S., Huang W.-C., Weng Z., Lee H.-C., 2018a The  
11 piRNA targeting rules and the resistance to piRNA silencing in endogenous genes.  
12 *Science* **359**: 587–592.
- 13 Zhang L., Köhler S., Rillo-Bohn R., Dernburg A. F., 2018b A compartmentalized  
14 signaling network mediates crossover control in meiosis. *eLife* **7**: 245.
- 15 Zhang L., Ward J. D., Cheng Z., Dernburg A. F., 2015 The auxin-inducible degradation  
16 (AID) system enables versatile conditional protein depletion in *C. elegans*.  
17 *Development* **142**: 4374–4384.

18

19 **Figure Legends**

1 **Figure 1. Schematic of the auxin-inducible degron (AID) system.** The plant F-box  
2 protein TIR1 is expressed using a promoter of interest with a desired spatiotemporal  
3 expression pattern. TIR1 interacts with endogenous Skp1 and Cul1 proteins to form an  
4 SCF E3 ubiquitin ligase complex. An auxin-inducible degron sequence (AID) is fused to  
5 a protein of interest. We use a minimal, 44 amino acid degron sequence (AID\*), but a full-  
6 length 229 amino acid AID tag or a 68 amino acid mini AID (mAID) are used in other  
7 systems. In the presence of the plant hormone auxin, TIR1 recognizes and binds the AID  
8 sequence, leading to ubiquitination and subsequent degradation of the AID-tagged  
9 protein. In *C. elegans*, the system is frequently used with single-copy TIR1 transgenes  
10 inserted into neutral loci, and AID\* knock-ins into genes of interest, though  
11 extrachromosomal arrays can also be used.

12

13 **Figure 2. A new TIR1 expression system allows assessment of TIR1 expression**  
14 **and activity.** A) The new TIR1 expression construct contains a  
15 *TIR1::F2A::BFP::AID\*::cMyc-NLS* transgene cassette. An F2A skip sequence results in  
16 expression of two separate protein products: 1) TIR1 which will interact with endogenous  
17 SCF proteins to produce an E3 ubiquitin ligase complex, which can only bind the AID  
18 sequence in the presence of auxin; and 2) an AID\*-tagged BFP protein with a cMyc  
19 nuclear localization signal (NLS) that functions as a readout for TIR1 expression  
20 and activity. The use of BFP as a reporter makes this construct compatible with  
21 simultaneous GFP and RFP imaging. B) Adult animals expressing  
22 *sun1p::TIR1::F2A::BFP::AID\*::NLS*. A control animal expresses AID\*-tagged BFP in the  
23 nuclei of germline and embryonic cells (white arrows). When animals are exposed to 1

1 mM auxin, BFP expression is undetectable. BFP channel and DIC images are provided  
2 for each condition. Note that the fluorescence signal at the lower right-hand side of each  
3 BFP image is due to intestinal autofluorescence. Scale bars represent 50  $\mu$ m.

4

5 **Figure 3. A new suite of TIR1 expression strains for tissue-specific depletion of**  
6 **AID-tagged proteins in *C. elegans*.** A) Table describing new suite  
7 of TIR1::F2A::BFP::AID\*::NLS strains. Strain names, promoter driving TIR1, tissue of  
8 expression, genotype, and insertion site are provided for each strain. The insertion sites  
9 are the genomic loci where the Mos1 transposon landed in the ttTi4348 and ttTi5605  
10 insertion alleles. We note that our knock-ins were generated using CRISPR/Cas9-  
11 mediated genome editing in wildtype animals or in strains stably expressing Cas9 in the  
12 germline; there is no Mos1 transposon in these loci in these genetic backgrounds. B) BFP  
13 is detected in the expected nuclei of strains expressing TIR1 cassettes driven by *col-10p*  
14 (*hypodermis*), *unc-54p* (*muscle*), *ges-1p* (*intestine*), and *rgef-1p* (*neurons*). A  
15 representative BFP expressing nucleus is indicated by a solid arrow. Scale bars represent  
16 20  $\mu$ m. Note that the fluorescence signal at the bottom of the muscle image and  
17 surrounding the nuclei in the intestinal image is intestinal autofluorescence, and indicated  
18 by an unfilled arrow with a dashed outline. C) Functional test of TIR1 activity in a *col-*  
19 *10p::TIR1::F2A::BFP::AID\*::NLS* strain (DV3799). Hypodermal BFP expression is lost  
20 when animals are exposed to 1 mM auxin for three hours, but not when similarly grown  
21 on control plates.

1 **Figure 4. NHR-25::GFP::AID\*::3xFLAG can be depleted in a cell-specific manner in**  
2 **a strain with undetectable TIR1 expression via a BFP reporter.** A) An anchor cell  
3 (AC)-specific TIR1 transgene (*cdh-3p::TIR1::F2A::BFP::AID\*::NLS*) did not produce  
4 observable BFP in the AC. Crossing this strain to an *nhr-25::GFP::AID\*::3xFLAG* allele  
5 resulted in depletion of NHR-25 in the AC when exposed to 1 mM Auxin for 1 hr (indicated  
6 by white arrow with black outline). Depletion of NHR-25 was not observed in the  
7 neighboring uterine cells or the underlying vulval precursor cells (VPCs). Scale bar  
8 represents 5  $\mu$ m. B) Quantification of NHR-25::GFP::AID\*::3xFLAG in ACs following  
9 auxin (K-NAA) treatment. Data presented as the mean ( $n \geq 10$  animals examined for each  
10 condition; \*\*\*\* indicates  $P < 0.0001$  by a two-tailed unpaired Student's t-test.  $P < 0.05$  was  
11 considered statistically significant). Scale bars represent 5  $\mu$ m.

12

13 **Figure 5. A collection of vectors to generate FP::AID\* knock-ins through Gibson**  
14 **cloning into self-excising cassette (SEC) vectors or through generation of linear**  
15 **repair templates.** A) Schematic of the AID\* containing vectors produced by modifying  
16 the set of vectors originally described by Dickinson *et al.* (2015). An AID\* epitope was  
17 inserted downstream of the loxP-flanked SEC. New repair templates for CRISPR/Cas9-  
18 mediated genome editing are produced by restriction digestion of the vector and Gibson  
19 cloning of PCR-derived homology arms, as described (Dickinson *et al.*, 2015).  
20 Counterselection against the parent vector is provided by *ccdB* cassettes. B) Suite of  
21 FP::AID\* SEC vectors available through Addgene. The vectors described in Dickinson *et*  
22 *al.* (2015) have been modified to insert an AID\* or 23 amino acid biotin acceptor peptide  
23 (BioTag)::AID\* cassette between the SEC and 3xFLAG cassette. C) A set of vectors to

1 generate repair templates for Cas9 ribonucleoprotein complex (RNP)-based genome  
2 editing. FP and FP::AID\* cassettes are flanked by flexible linker sequences. A 30 amino  
3 acid sequence is at the 5' end of the cassette, and a 10 amino acid sequence is at the 3'  
4 end of the cassette. This design provides flexibility for designing repair templates for N-  
5 terminal, C-terminal, or internal tagging. D) Schematic of how to generate linear repair  
6 templates by PCR. Primers with homology to the cassette and 5' homology to the desired  
7 integration site are used to amplify a dsDNA repair template. 35-120 bp homology arms  
8 are recommended, as previously described (Paix *et al.* 2014; 2015; Dokshin *et al.* 2018).

9  
10 **Figure 6. A suite of new vectors for the SapTrap cloning system.** A) SapI is a type II  
11 restriction enzyme that cuts one base pair and four base pairs outside of its binding site,  
12 allowing for the generation of programable 3bp sticky ends. B) SapTrap cloning facilitates  
13 single reaction cloning of multiple fragments, in the correct order, into a single repair  
14 template plasmid. Specific sticky ends are used for specific cassettes. C) Table of new  
15 vectors generated for the SapTrap CT and NT slots. Our initial assembly efficiencies were  
16 sub-optimal, and we found that reducing the number of fragments assembled improved  
17 our efficiencies. We have generated a set of multi-cassettes where partial assemblies  
18 (CT-FP, FP-SEC-NT, and CT-FP-SEC-NT) have been cloned, simplifying the SapTrap  
19 reactions and reducing the number of fragments required.

20  
21 **Figure S1. Functional test of new TIR1 expressing strains.** Strains of the indicated  
22 genotypes were grown on 1 mM water-soluble synthetic auxin (potassium salt of 1-  
23 naphthaleneacetic acid; K-NAA) for ~24 hours (*myo-3p* and *vha-8p*) or for one hour (*mex-*

1 *5p*, *dpy-7p*, and *eft-3p*) before imaging. Animals were similarly grown on control seeded  
2 NGM plates lacking K-NAA. For all strains, the expected BFP expression pattern was  
3 observed in control animals, and BFP expression was reduced or lost in auxin treated  
4 animals. Scale bars represent 20  $\mu\text{m}$  (*myo-3p*, *vha-8p*), 15  $\mu\text{m}$  (*dpy-7p*, *eft-3p*), and 40  
5  $\mu\text{m}$  (*mex-5p*).

**Ashley et al. (2020) Figure 1**

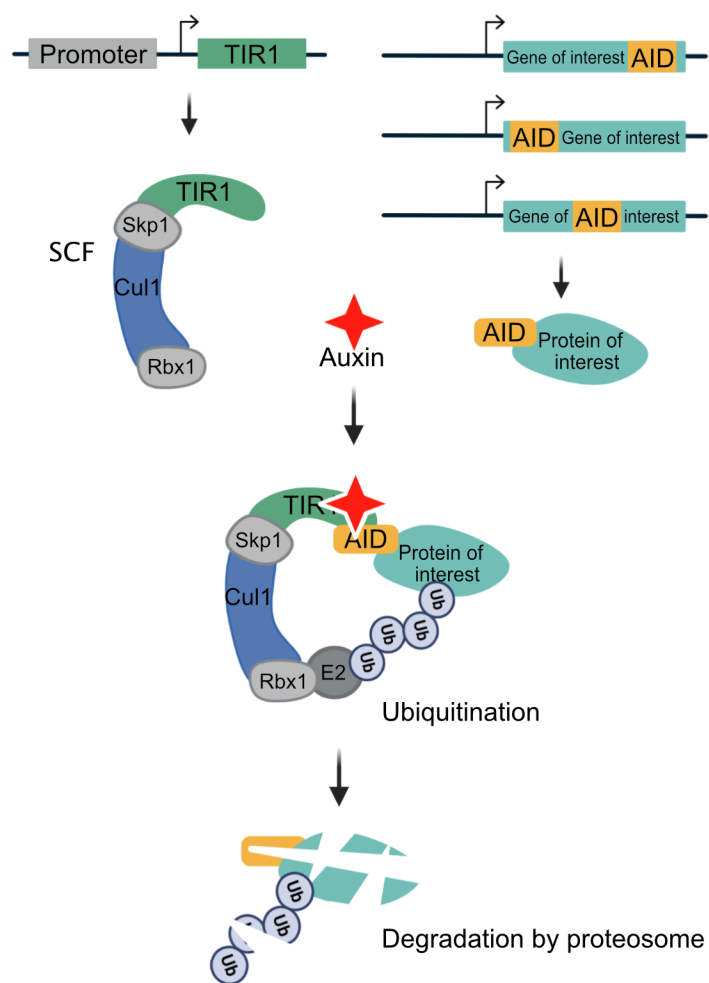

Ashley et al. (2020) Figure 2

**A**

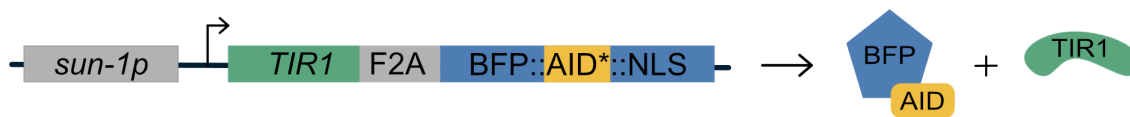

**B**

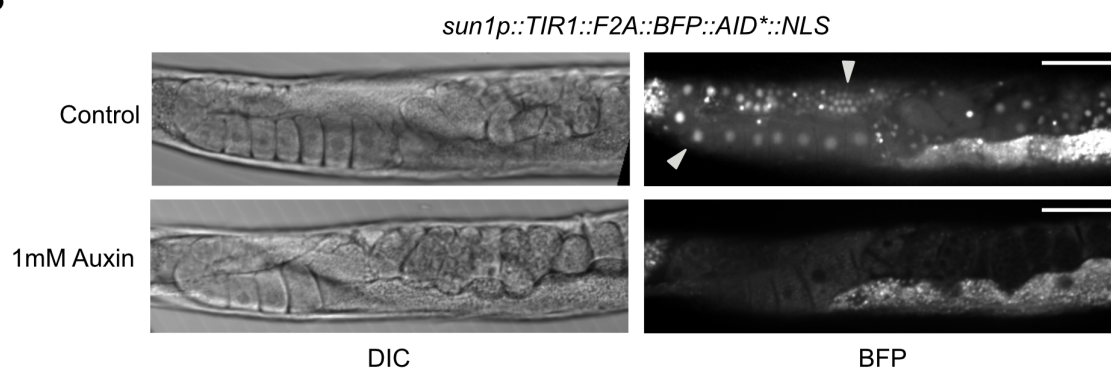



**Ashley et al. (2020) Figure 3**

**A** TIR1 driver strains

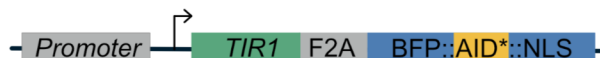

| Strain | Promotor                | Tissue            | Genotype                                                       | Insertion site |
|--------|-------------------------|-------------------|----------------------------------------------------------------|----------------|
| LP869  | <i>vha-8p</i>           | Multiple tissue   | <i>cpSi171[vha-8p::TIR1::F2A::BFP::AID*::NLS::tbb-2 3'UTR]</i> | I:-5.32        |
| JDW234 | <i>smu-1p</i>           | Soma and Germline | <i>wrdSi25[smu-1p::TIR1::F2A::BFP::AID*::NLS::tbb-2 3'UTR]</i> | I:-5.32        |
| JDW225 | <i>eft-3p</i>           | Soma              | <i>wrdSi23[eft-3p::TIR1::F2A::BFP::AID*::NLS::tbb-2 3'UTR]</i> | I:-5.32        |
| DV3799 | <i>col-10p</i>          | Hypodermis        | <i>reSi1[col-10p::TIR1::F2A::BFP::AID*::NLS::tbb-2 3'UTR]</i>  | I:-5.32        |
| DV3800 | <i>col-10p</i>          |                   | <i>reSi2[col-10p::TIR1::F2A::BFP::AID*::NLS::tbb-2 3'UTR]</i>  | II:-0.77       |
| JDW227 | <i>dpy-7p</i>           |                   | <i>wrdSi45[dpy-7p::TIR1::F2A::BFP::AID*::NLS::tbb-2 3'UTR]</i> | II:-0.77       |
| JDW229 | <i>dpy-7p</i>           |                   | <i>wrdSi47[dpy-7p::TIR1::F2A::BFP::AID*::NLS::tbb-2 3'UTR]</i> | I:-5.32        |
| JDW231 | <i>SCMp<sup>‡</sup></i> | Seam cells        | <i>wrdSi44[SCMp*::TIR1::F2A::BFP::AID*::NLS::tbb-2 3'UTR]</i>  | II:-0.77       |
| JDW233 | <i>SCMp<sup>‡</sup></i> |                   | <i>wrdSi46[SCMp*::TIR1::F2A::BFP::AID*::NLS::tbb-2 3'UTR]</i>  | I:-5.32        |
| JDW221 | <i>mex-5p</i>           | Germline          | <i>wrdSi18[mex-5p::TIR1::F2A::BFP::AID*::NLS::tbb-2 3'UTR]</i> | I:-5.32        |
| JDW223 | <i>mex-5p</i>           |                   | <i>wrdSi35[mex-5p::TIR1::F2A::BFP::AID*::NLS::tbb-2 3'UTR]</i> | II:-0.77       |
| JDW10  | <i>sun-1p</i>           |                   | <i>wrdSi3[sun-1p::TIR1::F2A::BFP::AID*::NLS::tbb-2 3'UTR]</i>  | II:-0.77       |
| DV3801 | <i>unc-54p</i>          | Muscle            | <i>reSi3[unc-54p::TIR1::F2A::BFP::AID*::NLS::tbb-2 3'UTR]</i>  | I:-5.32        |
| DV3825 | <i>unc-54p</i>          |                   | <i>reSi11[unc-54p::TIR1::F2A::BFP::AID*::NLS::tbb-2 3'UTR]</i> | II:-0.77       |
| LP871  | <i>myo-3p</i>           |                   | <i>cpSi174[myo-3p::TIR1::F2A::BFP::AID*::NLS::tbb-2 3'UTR]</i> | I:-5.32        |
| DV3803 | <i>ges-1p</i>           | Intestine         | <i>reSi5[ges-1p::TIR1::F2A::BFP::AID*::NLS::tbb-2 3'UTR]</i>   | I:-5.32        |
| DV3826 | <i>ges-1p</i>           |                   | <i>reSi12[ges-1p::TIR1::F2A::BFP::AID*::NLS::tbb-2 3'UTR]</i>  | II:-0.77       |
| DV3805 | <i>rgef-1p</i>          | Neuron            | <i>reSi7[rgef-1p::TIR1::F2A::BFP::AID*::NLS::tbb-2 3'UTR]</i>  | I:-5.32        |
| DQM526 | <i>cdh-3p</i>           | Anchor cells      | <i>bmd176[cdh-3p::TIR1::F2A::BFP::AID*::NLS::tbb-2 3'UTR]</i>  | II:-0.77       |

<sup>‡</sup> SCM promotor is a 573bp enhancer from *arf-3* intronic sequence + *pes-10Δ*

**B**

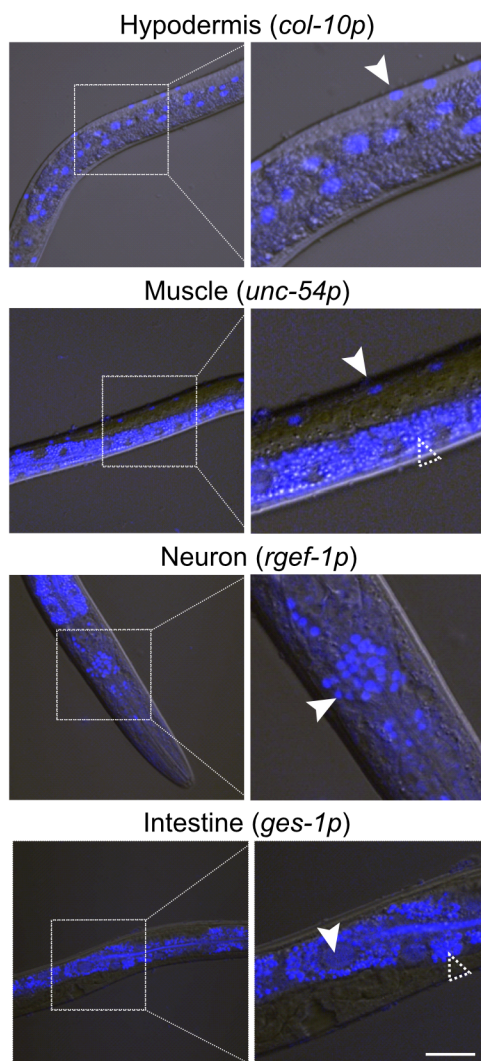

**C**

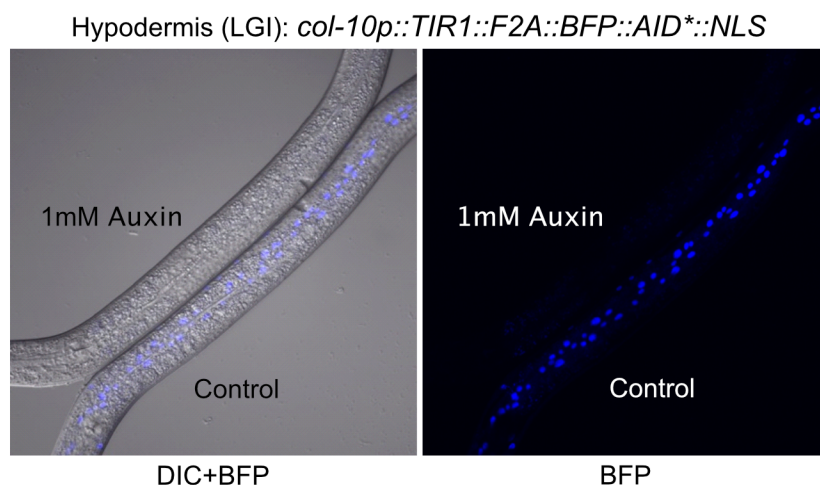

**Ashley et al. (2020) Figure 4**

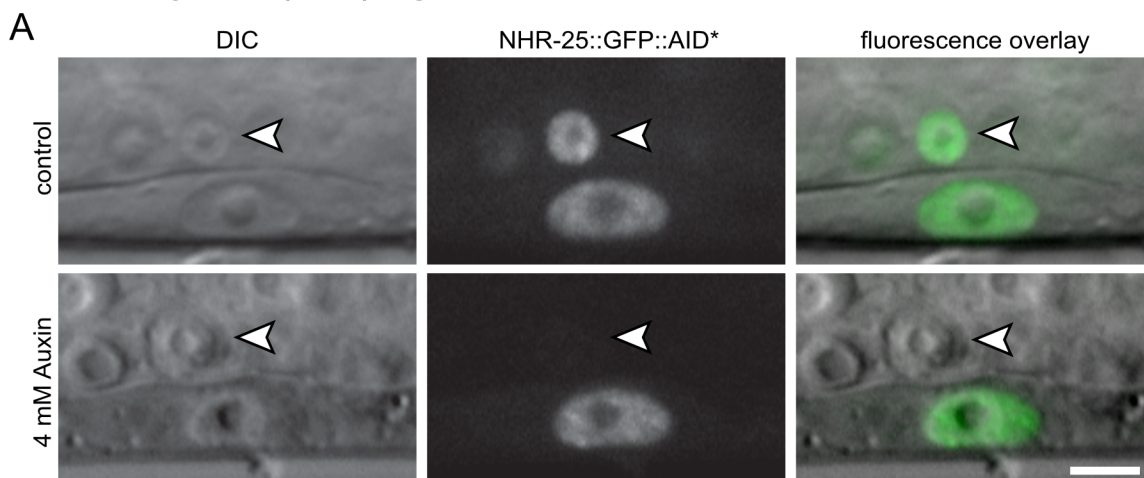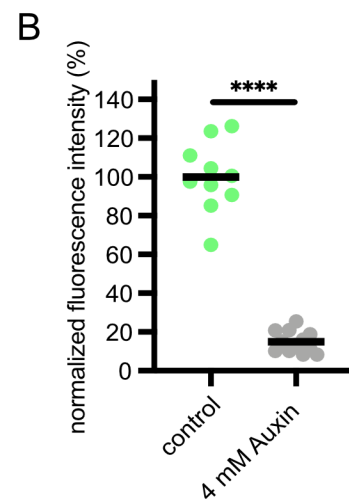

**Ashley et al. (2020) Figure 5**

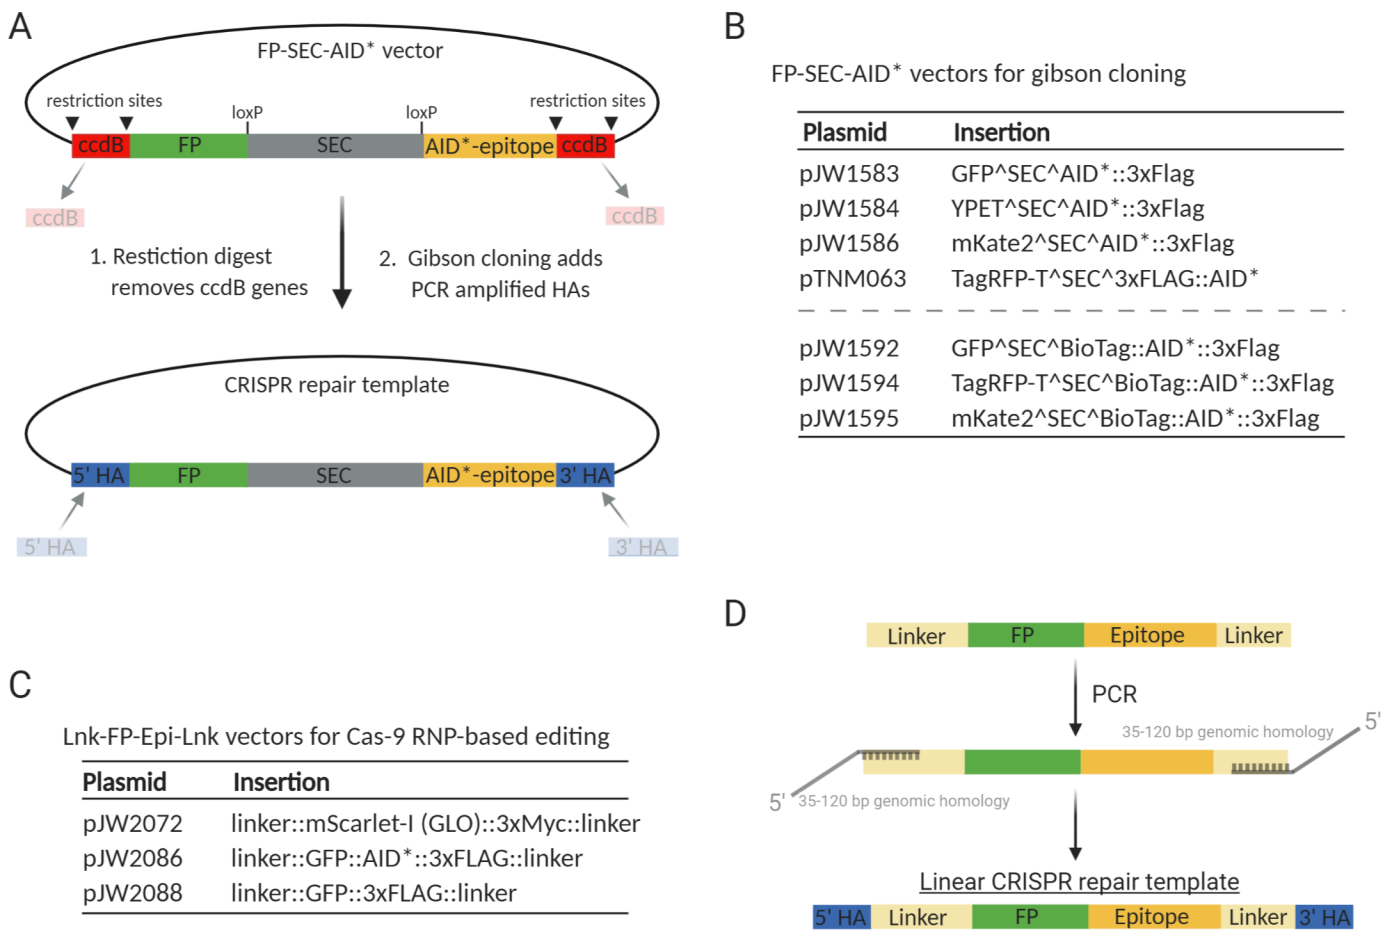

# Ashley et al. (2020) Figure 6

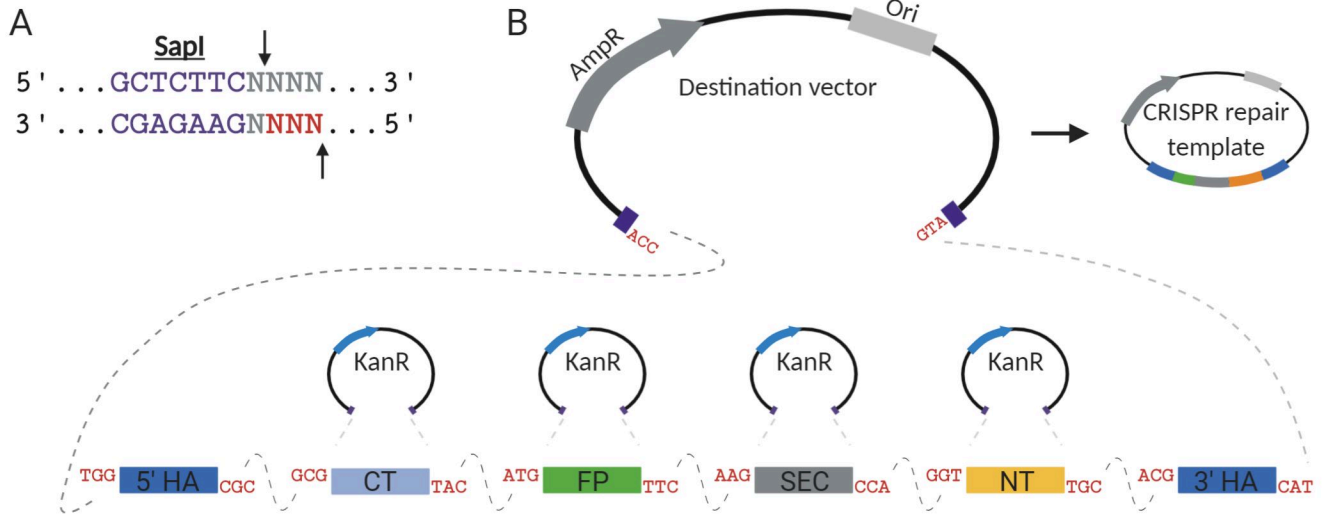

**C**

New cassettes for SapTrap

| Plasmid  | Insertion                                                               |
|----------|-------------------------------------------------------------------------|
| pJW1347  | 30aa linker for CT slot                                                 |
| pJW1788  | 30aa linker::TEV::BioTag::AID*::3xFLAG for CT slot                      |
| pJW 1805 | 30aa-linker::3xMyc for CT slot                                          |
| -----    |                                                                         |
| pJW1348  | 30aa linker for NT slot                                                 |
| pJW1659  | 30aa linker::AID*::3xFLAG for NT slot                                   |
| pJW1759  | 30aa linker::TEV::AID*::3xFLAG for NT slot                              |
| pJW1787  | 30aa linker::TEV::BioTag::AID*::3xFLAG for NT slot                      |
| pJW1806  | 30aa linker::3xMyc for NT slot                                          |
| -----    |                                                                         |
| pJW1822  | 30aa linker::GFP                                                        |
| pJW1827  | 30aa linker::mScarlet-I                                                 |
| -----    |                                                                         |
| pJW1820  | GFP^SEC (LoxP)^AID*::3xFLAG                                             |
| -----    |                                                                         |
| pJW1816  | 30aa linker::mScarlet-I^SEC (Lox511I)^3xMyc                             |
| pJW1846  | 30aa linker::GFP^SEC^AID*::3xFLAG                                       |
| pJW1886  | 30aa linker:: <sup>‡</sup> mScarlet-I^SEC (Lox511I)^TEV::degron::3xFLAG |

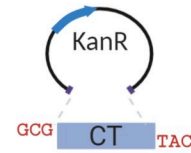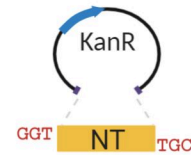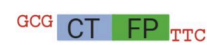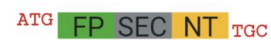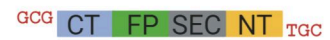

<sup>‡</sup>mScarlet-I is germline optimized



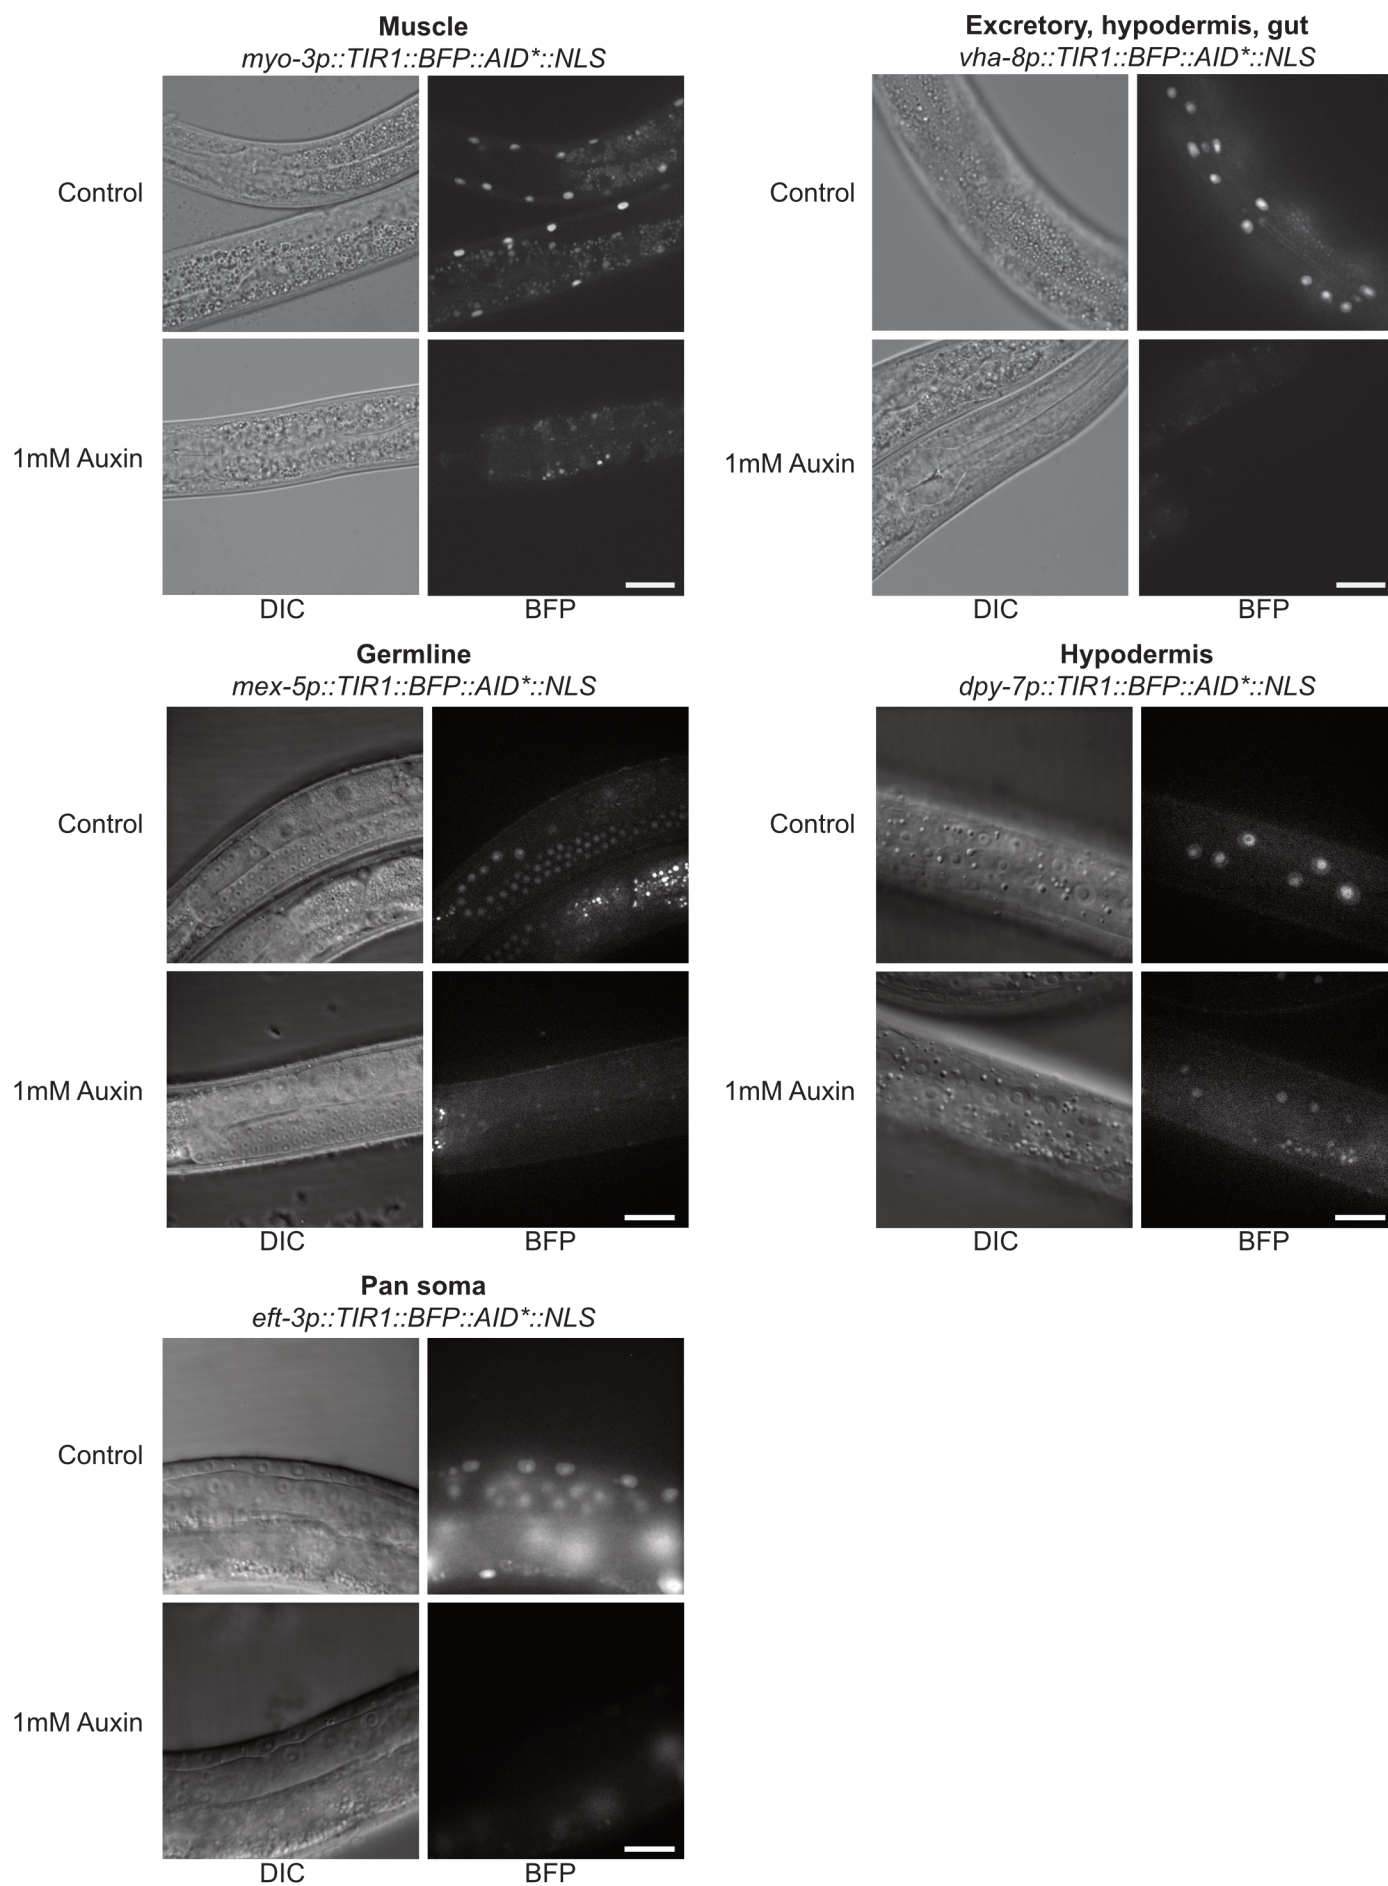

Source: https://www.biorxiv.org/content/10.1101/2020.05.12.090217.full.pdf
